# Supplementary material for: Colorectal cancer awareness and its predictors among adults aged 50–74 years attending primary healthcare in the State of Qatar: a cross-sectional study
Source: PubMed Central journal article supplement — BMJ Open. 2020 Jul 7;10(7):e035651. doi: 10.1136/bmjopen-2019-035651 (PMC7342467; doi:10.1136/bmjopen-2019-035651), 2020-07-07
Supplement: bmjopen-2019-035651.draft_revisions.pdf [file bmjopen-2019-035651.draft_revisions.pdf]

# BMJ Open

BMJ Open is committed to open peer review. As part of this commitment we make the peer review history of every article we publish publicly available.

When an article is published we post the peer reviewers' comments and the authors' responses online. We also post the versions of the paper that were used during peer review. These are the versions that the peer review comments apply to.

The versions of the paper that follow are the versions that were submitted during the peer review process. They are not the versions of record or the final published versions. They should not be cited or distributed as the published version of this manuscript.

BMJ Open is an open access journal and the full, final, typeset and author-corrected version of record of the manuscript is available on our site with no access controls, subscription charges or pay-per-view fees (<http://bmjopen.bmj.com>).

If you have any questions on BMJ Open's open peer review process please email [info.bmjopen@bmj.com](mailto:info.bmjopen@bmj.com)

# BMJ Open

## Colorectal Cancer Awareness and Its Predictors among adults aged 50 to 74 years in the State of Qatar, 2019

|                               |                                                                                                                                                                                                                                                                                                                                                                                                      |
|-------------------------------|------------------------------------------------------------------------------------------------------------------------------------------------------------------------------------------------------------------------------------------------------------------------------------------------------------------------------------------------------------------------------------------------------|
| Journal:                      | <i>BMJ Open</i>                                                                                                                                                                                                                                                                                                                                                                                      |
| Manuscript ID                 | bmjopen-2019-035651                                                                                                                                                                                                                                                                                                                                                                                  |
| Article Type:                 | Original research                                                                                                                                                                                                                                                                                                                                                                                    |
| Date Submitted by the Author: | 10-Nov-2019                                                                                                                                                                                                                                                                                                                                                                                          |
| Complete List of Authors:     | AL DAHSHAN, AYMAN; Hamad Medical Corporation Department of Medical Education, Chehab, Mohamad; Hamad Medical Corp, Community Medicine Bala, Mohamed; Hamad Medical Corporation, Al-Kubaisi, Noora; Primary Health Care Corporation, clinical affairs AlMohamed, Omayma; Primary Health Care Corporation Omer , Mieaad ; Hamad Medical Corporation, Community medicine Selim, Nagah; Cairo University |
| Keywords:                     | EPIDEMIOLOGY, Gastrointestinal tumours < GASTROENTEROLOGY, PRIMARY CARE, PREVENTIVE MEDICINE, PUBLIC HEALTH                                                                                                                                                                                                                                                                                          |
|                               |                                                                                                                                                                                                                                                                                                                                                                                                      |

SCHOLARONE™  
Manuscripts

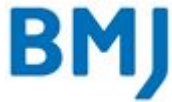

I, the Submitting Author has the right to grant and does grant on behalf of all authors of the Work (as defined in the below author licence), an exclusive licence and/or a non-exclusive licence for contributions from authors who are: i) UK Crown employees; ii) where BMJ has agreed a CC-BY licence shall apply, and/or iii) in accordance with the terms applicable for US Federal Government officers or employees acting as part of their official duties; on a worldwide, perpetual, irrevocable, royalty-free basis to BMJ Publishing Group Ltd ("BMJ") its licensees and where the relevant Journal is co-owned by BMJ to the co-owners of the Journal, to publish the Work in this journal and any other BMJ products and to exploit all rights, as set out in our [licence](#).

The Submitting Author accepts and understands that any supply made under these terms is made by BMJ to the Submitting Author unless you are acting as an employee on behalf of your employer or a postgraduate student of an affiliated institution which is paying any applicable article publishing charge ("APC") for Open Access articles. Where the Submitting Author wishes to make the Work available on an Open Access basis (and intends to pay the relevant APC), the terms of reuse of such Open Access shall be governed by a Creative Commons licence – details of these licences and which [Creative Commons](#) licence will apply to this Work are set out in our licence referred to above.

Other than as permitted in any relevant BMJ Author's Self Archiving Policies, I confirm this Work has not been accepted for publication elsewhere, is not being considered for publication elsewhere and does not duplicate material already published. I confirm all authors consent to publication of this Work and authorise the granting of this licence.

1  
2  
3 1 **Colorectal Cancer Awareness and Its Predictors among adults aged 50 to 74 years in the**  
4  
5 2 **State of Qatar, 2019**  
6

7  
8 3 Ayman Al-Dahshan <sup>(1)\*</sup>, Mohamad Chehab <sup>(1)</sup>, Mohamed Bala <sup>(1)</sup>, Mieaad Omer <sup>(1)</sup>, Omayma  
9  
10 4 AlMohamed <sup>(2)</sup>, Noora Al-Kubaisi <sup>(2)</sup>, Nagah Selim <sup>(2,3)</sup>  
11

12  
13 5 **1:** Community Medicine Residency Program, Hamad Medical Corporation, Doha, Qatar;  
14

15 6 [Ayman.aldahshan@hotmail.com](mailto:Ayman.aldahshan@hotmail.com); [mchehab2@hamad.qa](mailto:mchehab2@hamad.qa); [mbala@hamad.qa](mailto:mbala@hamad.qa);

16  
17 7 [mieaad1@hotmail.com](mailto:mieaad1@hotmail.com).  
18

19  
20  
21 8 **2:** Primary Health Care Corporation, Doha, Qatar; [omsalmohd@phcc.gov.qa](mailto:omsalmohd@phcc.gov.qa);

22  
23 9 [njalkubaisi@phcc.gov.qa](mailto:njalkubaisi@phcc.gov.qa); [nselim@phcc.gov.qa](mailto:nselim@phcc.gov.qa).  
24

25 10 **3:** Department of Public Health, Faculty of Medicine, Cairo University, Cairo, Egypt  
26  
27

28  
29  
30 12 **\*: Corresponding author:** Dr. Ayman Al-Dahshan, Community Medicine Residency Program,  
31

32  
33 13 Department of Medical Education, Hamad Medical Corporation, Doha, Qatar. P.O. Box 3050;  
34

35 14 Email: [Ayman.aldahshan@hotmail.com](mailto:Ayman.aldahshan@hotmail.com)  
36  
37

38 15 Word count: 2637  
39  
40  
41  
42  
43  
44  
45  
46  
47  
48  
49  
50  
51  
52  
53  
54  
55  
56  
57  
58  
59  
60

1  
2  
3 **23 Abstract**  
4

5 **24 Objective:** The current study aimed to assess the elderly's awareness regarding CRC risk factors,  
6  
7  
8 **25** symptoms, and its predictors.  
9

10  
11 **26 Design:** A cross-sectional study design was employed.  
12

13  
14 **27 Setting:** Across six primary health centers in Qatar  
15

16  
17 **28 Participants:** Clients (n=448), aged 50-74 years, attending at the main waiting areas of the  
18  
19 selected health centers and are Arabic or English speakers.  
20  
21

22 **30 Data collection and analysis:** Participants were interviewed using a modified version of the  
23  
24 **31** Cancer Awareness Measures (CAM) tool - Cancer Research UK. A non-probability sampling  
25  
26 **32** technique was applied to recruit participants. Data was analyzed using the SPSS version 22.  
27  
28 **33** Descriptive and analytic statistics were applied when appropriate. Multivariate linear regression  
29  
30 **34** was applied.  
31  
32

33  
34 **35 Results:** A total of 448 clients have participated in the study (response rate 87%). The mean age  
35  
36 **36** of the participants was 58.48 years (SD=6.37 years). The participants' mean awareness score (%)  
37  
38 **37** regarding CRC symptoms, risk factors, and overall were 40.3%, 49.3%, and 45.2% respectively.  
39  
40 **38** A multivariate linear regression analysis identified that being a female, a non-Qatari Arab, and  
41  
42 **39** having a formal education were independent predictors of higher CRC awareness.  
43  
44

45  
46 **40 Conclusion:** In conclusion, the present study has shown a low awareness regarding the symptoms  
47  
48 **41** and risk factors of CRC as well as the related national screening program in Qatar. Such results  
49  
50 **42** underline the importance of tailoring future educational campaigns that are relevant, specific, and  
51  
52 **43** appealing to such cohort, especially the nationals.  
53  
54  
55  
56 **44**

## 45 **Strengths and limitations of this study**

- 46 • This was the first study in the State of Qatar to evaluate CRC awareness and its predictors  
47 among a high-risk population.
- 48 • The study achieved a high response rate (87%) and included a sample from a variety of  
49 nationalities that represents the diversity of the community in Qatar.
- 50 • The use of a validated questionnaire to collect data from the target population strengthened  
51 the validity of the study.
- 52 • One of the limitations in this study was that recruiting participants from a healthcare setting  
53 may have over-estimated the awareness level of CRC.
- 54 • In addition, the non-probability sampling method utilized in the study may affect the  
55 generalizability of the results.

56 **Keywords:** colorectal cancer; awareness; symptoms; risk factors

## 66 INTRODUCTION

67 Colorectal cancer (CRC) is the second leading cause of cancer-related deaths and the third-most  
68 commonly diagnosed cancer globally. CRC accounted for almost 1.8 million new cases and about  
69 860,000 deaths during 2018. By 2030, the global burden of CRC is expected to increase by 60%  
70 and result in more than 2.2 million new cases and 1.1 million deaths. <sup>1</sup> In addition, a rapid rise in  
71 the incidence and mortality of CRC has been witnessed in several middle-to-high income countries  
72 in Asia, Eastern Europe, and South America. <sup>2</sup> On the other hand, there has been a decline in CRC-  
73 related mortality among western countries; partly attributed to their effective national screening  
74 programs. <sup>3</sup>

75 Like other non-communicable diseases, colorectal cancer possesses modifiable risk factors such  
76 as obesity, physical inactivity, consumption of red or processed meat, excessive alcohol intake,  
77 and smoking. Moreover, detectable symptoms of CRC include a persistent change of the normal  
78 bowel habits, bleeding through the back passage, feeling a lump in the abdomen, and unexplained  
79 extreme tiredness. <sup>4</sup>

80 The literature has revealed that CRC incidence can be reduced through a comprehensive approach  
81 that entails dietary modifications, regular physical activity and family- or community-based  
82 interventions for cancer prevention. <sup>5</sup> For instance, it has been estimated that more than a quarter  
83 (27%) of CRC cases could have been prevented through increasing fiber intake and decreasing red  
84 or processed meat consumption. In addition, almost one-seventh (14%) and one-fifth (12%) of  
85 CRC cases could have been avoided through the proper management of excess weight and physical  
86 inactivity. <sup>6</sup> Thus, public awareness about such modifiable risk factors is crucial for any public  
87 health strategies aimed at reduction or prevention of CRC.

1  
2  
3 88 Several studies have shown that the awareness and knowledge of CRC risk factors and symptoms  
4  
5 89 are positively linked to an increased likelihood of adherence to CRC screening recommendations.  
6  
7 90 <sup>7, 8, 9</sup> Despite growing evidence on the association between lifestyle factors and CRC incidence,  
8  
9 91 the awareness of such risk factors among the high-risk population group (aged 50-74 years old)  
10  
11 92 remains low. <sup>10</sup>

13  
14  
15 93 In the State of Qatar, the latest data shows that CRC is the second most commonly diagnosed  
16  
17 94 cancer (10.23%) among different nationalities and both genders. Moreover, more than two-thirds  
18  
19 95 (68%) of the relevant cases were diagnosed at an advanced stage. In 2016, Qatar launched its  
20  
21 96 national colorectal cancer-screening program. The program is a life-saving population-based  
22  
23 97 initiative that aims at promoting education, awareness, and early detection of bowel cancer to those  
24  
25 98 aged 50-74 years old. <sup>11</sup> It is in line with the Public Health Strategy 2017-2022 which focuses on  
26  
27 99 preventive and community-based care. <sup>12</sup> Given the diverse population of the country,  
28  
29 100 heterogeneous knowledge regarding CRC is expected. Thus, the current study aimed to assess the  
30  
31 101 awareness of clients (aged 50-74 years) regarding CRC risk factors, symptoms, and its predictors.  
32  
33  
34  
35

## 36 102 **4METHODS**

### 37 38 39 103 **Study design and setting**

40  
41 104 This was a cross-sectional study design conducted at the Primary Health Centers (PHCs) in the  
42  
43 105 state of Qatar. The PHCs are the first line of contact between the population and the national health  
44  
45 106 care system. Moreover, each PHC serves a large population of different ethnic, cultural, social and  
46  
47 107 educational backgrounds; which is representative of the community in Qatar.

48  
49  
50 108 The data was collected during both morning and evening work shifts of the health centers and the  
51  
52 109 data collection lasted from September 2018 till January 2019.

### 53 54 55 56 110 **Participants**



1  
2  
3 111 The target population included clients of the selected PHC centers aged 50-74 years old, both  
4  
5 112 Arabic and English speaking, regardless of their gender or nationality. The study excluded clients  
6  
7 113 who previously underwent screening for CRC and those not capable of communicating or  
8  
9 114 providing consent due to any disability (mental or physical). The former were excluded because  
10  
11 115 they received education about CRC symptoms and risk factors as part of their CRC screening  
12  
13  
14 116 procedure. As a result, their participation in the present study would have interfered with the  
15  
16 117 study's main objectives.

### 19 118 **Patient and public involvement**

20  
21  
22 119 We did not involve patients or the public in our work.

### 24 120 **Sample size**

25  
26  
27 121 According to Qatar's 2015 Census, there were 211,207 individuals aged 50 years and above in the  
28  
29 122 country. Thus, the estimated sample size was 384 clients given a 95% confidence interval, a  
30  
31 123 precision of 5%, and a hypothesis that 50% (+/-5%) of clients were aware of CRC.

### 34 124 **Sampling method**

35  
36  
37 125 At the time of the study, there were 23 PHC in the country. The study was conducted across six  
38  
39 126 PHCs chosen from the three operational health regions (North, West, and Central region) in the  
40  
41 127 country; the two busiest health centers from each region. Then, the participants were chosen  
42  
43 128 through convenient sampling, which included those aged 50-74 years who attend the selected  
44  
45 129 primary health centers.

### 49 130 **Research Protocol**

50  
51 131 The data collection was done through face-to-face structured interviews using the questionnaire  
52  
53 132 described below. The eligible participants were approached by trained interviewers (resident  
54  
55 133 physicians) at the main waiting areas of the selected PHCs. After that, they were given a brief

1  
2  
3 134 orientation about the study and invited to participate in the survey. All those, who consented, were  
4  
5 135 interviewed in their preferred language and the duration of the interview lasted between 15 to 20  
6  
7 136 minutes. Upon completing the interview, the respondents were encouraged to ask any question and  
8  
9 137 then were provided with an educational booklet on bowel cancer in both languages (Arabic and  
10  
11 138 English). Additionally, the data collectors counseled all participants about bowel cancer and  
12  
13  
14 139 invited them to participate in the national bowel cancer screening program. Those who had  
15  
16 140 concerns or who showed any potential symptoms or signs of bowel cancer were asked to inform  
17  
18 141 their primary care physician for further assessment and follow up.  
19  
20

## 21 142 **Data collection tool**

22  
23  
24 143 The current study utilized a validated questionnaire based on a modified version of the Cancer  
25  
26 144 Awareness Measures-Cancer Research UK survey (bowel cancer). The survey was designed to  
27  
28 145 examine the general public's awareness of CRC. The questionnaire possesses a satisfactory  
29  
30 146 internal reliability with Cronbach's alpha of 0.84 for all components and the test-retest reliability  
31  
32 147 was  $r = 0.7$ . Further details about the questionnaire have been described elsewhere.<sup>13</sup>  
33  
34 148 Subsequently, the study's questionnaire was translated and back-translated (English-Arabic) by  
35  
36 149 two independent professional translators and any aberrancy was corrected accordingly.  
37  
38 150 Furthermore, it was piloted on a number of participants similar to the study population and  
39  
40 151 modifications were done based where necessary.  
41  
42 152 As a result, the current questionnaire composed of three main sections. Section A consisted of six  
43  
44 153 questions exploring the background characteristics of the participants (age, gender, nationality,  
45  
46 154 marital status, level of education, employment status). Section B consisted of nine closed-ended  
47  
48 155 questions designed to measure the participants' awareness regarding CRC warning symptoms.  
49  
50 156 Section C encompassed eleven closed-ended questions that identified the participants' awareness  
51  
52  
53  
54  
55  
56  
57  
58  
59  
60

1  
2  
3 157 of CRC risk factors. Regarding sections B and C, the participants were instructed to select one of  
4  
5 158 three choices (Yes, No, I don't know). The answers to the aforementioned questions were coded  
6  
7 159 as correct or incorrect, where the researchers assigned one point for each "correct" response and  
8  
9 160 null for the "incorrect or I don't know" responses. As a result, the correct answers were summed  
10  
11 161 and the percentage score was calculated accordingly. Thus, the total scores for sections B and C  
12  
13  
14 162 ranged from 0 to 9 and 11 respectively.

### 17 163 **Statistical analysis**

18  
19 164 The collected data was analyzed using the Statistical Package for the Social Sciences-SPSS version  
20  
21  
22 165 22. Both descriptive and analytic statistics were applied when appropriate. The level of statistical  
23  
24 166 significance was set at 0.05. We used parametric testing including the independent t-test and  
25  
26 167 ANOVA test to compare subgroups and detect any statistically significant difference in the  
27  
28 168 individual and total mean score of CRC awareness. A multivariate linear regression model was  
29  
30  
31 169 constructed to identify the independent predictors of CRC awareness and tested for interactions  
32  
33 170 and collinearity. Variables were included in the final model if they were deemed to be clinically  
34  
35 171 important or if they were found to have a P value of  $< 0.25$  on bivariable analysis. Unstandardized  
36  
37 172 Beta coefficients with 95% CIs and P values were reported for each of the predictors based on the  
38  
39 173 above regression model.

## 42 43 174 **RESULTS**

### 44 45 46 175 **Demographic characteristics**

47  
48 176 Five hundred and fifteen (515) eligible candidates were approached for enrolment in the study, 67  
49  
50 177 of whom refused to participate. As a result, 448 clients participated in the present study (response  
51  
52 178 rate: 87%). Table 1 presents the background characteristics of the study participants, where most  
53  
54 179 respondents were females (53.5%), non-Qatari Arabs (52.2%), married (86.8%), with Diploma or  
55  
56  
57  
58  
59  
60

180 University degree (43.6%), and unemployed (54.4%). The mean age of the participants was 58.48  
 181 years (SD=6.37 years).

182 **Table 1.** Background characteristics of participants (n=448)

| Variable                  | N (%)      |
|---------------------------|------------|
| <b>Age</b>                |            |
| 50-59                     | 254 (56.7) |
| 60 or more                | 194 (43.3) |
| <b>Gender</b>             |            |
| Male                      | 208 (46.5) |
| Female                    | 239 (53.5) |
| <b>Nationality</b>        |            |
| Qatari                    | 107 (24)   |
| Non-Qatari Arab           | 233 (52.2) |
| Non-Arab                  | 106 (23.8) |
| <b>Marital status</b>     |            |
| Married                   | 389 (86.8) |
| Divorced/Widow            | 51 (11.4)  |
| Single                    | 8 (1.8)    |
| <b>Level of education</b> |            |
| No formal education       | 69 (15.4)  |
| Primary                   | 82 (18.3)  |
| Secondary                 | 101 (22.6) |
| Diploma or University     | 195 (43.6) |
| <b>Employment</b>         |            |
| Employed                  | 204(45.6)  |
| Unemployed                | 243(54.4)  |

183 \*\* Non-Arab includes Asian, Western and African

#### 184 **Awareness of colorectal cancer symptoms and risk factors**

185 Table 2 describes the percentages of participants who correctly identified the symptoms and risk  
 186 factors of CRC. Out of nine symptoms related to CRC, the most commonly reported symptom by  
 187 the respondents was a “lump in abdomen” (56.5 %) followed by “unexplained weight loss” (54.5  
 188 %) and “blood in stool” (46.9%). On the other hand, the least commonly reported symptoms were  
 189 “pain in back passage” (22.5%) and “bowel doesn’t empty” (27.9%).

190 Regarding the risk factors of CRC, the most commonly identified were the daily consumption of  
 191 processed meat (71.7%), tobacco use (69.2%), and alcohol use (63.6 %). However, only about one

192 third of participants (34.4%) correctly identified low intake of fruit and vegetables as a risk factor  
 193 of CRC. Diabetes (23.7 %) was the least identified risk factors.

194 Additionally, women were more likely to aware of the link between lifestyle behaviors and CRC  
 195 than their male counterparts. In that regards, a statistically significant gender difference was noted  
 196 in which women were more knowledgeable than men about the association of CRC with the  
 197 following factors: eating less than five servings of fruit and vegetables (46% vs. 21%; P = 0.000),  
 198 eating processed meat daily (76% vs. 67%; P = 0.02), drinking alcohol (69% vs. 58%; P= 0.01),  
 199 and smoking (75% vs. 64%; P = 0.01). On the other hand, non-Arabic participants were more  
 200 likely to report that being overweight could increase the risk of CRC compared to the Qatari and  
 201 Arab participants (51% vs. 27% vs 45%; P = 0.001). However, Arab respondents were more likely  
 202 to acknowledge that consuming a low-fiber diet was a risk factor for CRC than their Qatari peers  
 203 (53% vs. 26% P = 0.000).

204 **Table 2.** Frequency distribution regarding the awareness of colorectal cancer symptoms and risk  
 205 factors among of participants (n=448)

| CRC symptoms                   | % (n)      |
|--------------------------------|------------|
| Lump in abdomen                | 56.5 (253) |
| Unexplained weight loss        | 54.5 (244) |
| Blood in stools                | 46.9 (210) |
| Pain in abdomen                | 42.2 (189) |
| Change in bowel habit          | 38.6 (173) |
| Bleeding back passage          | 38.2 (171) |
| Tiredness                      | 35.3 (158) |
| Bowel does not empty           | 27.9 (125) |
| Pain in back passage           | 22.5 (101) |
| CRC risk factors               |            |
| Daily eating of processed meat | 71.7 (321) |
| Tobacco smoking                | 69.2 (310) |
| Drinking Alcohol               | 63.6 (285) |
| Chronic bowel disease          | 54 (242)   |

|                                          |            |
|------------------------------------------|------------|
| Daily eating of red meat                 | 53.3 (239) |
| Close relative with CRC                  | 46 (206)   |
| Diet low in fiber                        | 45.5 (204) |
| Overweight (BMI>25)                      | 41.7 (187) |
| Older age                                | 37.7 (169) |
| Low fruit & vegetables (<5 servings/day) | 34.4 (154) |
| Diabetes                                 | 23.7 (106) |

206

### 207 Mean score awareness of colorectal cancer

208 Figure 1 portrays the mean score of CRC awareness among participants in general and specific to  
 209 its symptoms and risk factors. The level of awareness regarding the symptoms and risk factors of  
 210 CRC was calculated as a score in percentage. While the mean score of the participants' awareness  
 211 about CRC symptoms was 3.63/9 (40.3%), the corresponding mean score of their awareness on  
 212 risk factors was 5.43/11 (49.3%). Subsequently, the overall score of awareness about both the  
 213 symptoms and risk factors of CRC was 9.04/20 (45.2%).

### 214 The relationship between background characteristics and the CRC awareness mean score

215 Table 3 describes the relationship between the participants' background characteristics and their  
 216 awareness mean score about CRC. Upon bivariate analyses, the respondents' gender, nationality,  
 217 and educational level were significantly associated with the component (symptoms, risk factors)  
 218 and total awareness scores ( $P < 0.05$ ).

219 **Table 3.** The association between participants' background characteristics and their awareness  
 220 regarding CRC symptoms, risk factors and overall. (n=448)

| Variable      | Awareness              |                 |                        |                 | Overall awareness      |                 |
|---------------|------------------------|-----------------|------------------------|-----------------|------------------------|-----------------|
|               | Symptoms               |                 | Risk factors           |                 | Mean score<br>(95% CI) | <i>p</i> -value |
|               | Mean score<br>(95% CI) | <i>p</i> -value | Mean score<br>(95% CI) | <i>p</i> -value |                        |                 |
| <b>Age</b>    |                        | 0.201           |                        | 0.082           |                        | 0.075           |
| 50-59         | 3.77 (3.42, 4.12)      |                 | 5.67 (5.26, 6.08)      |                 | 9.44 (8.76, 10.12)     |                 |
| 60 or more    | 3.43 (3.05, 3.82)      |                 | 5.12 (4.65, 5.59)      |                 | 8.50 (7.72, 9.28)      |                 |
| <b>Gender</b> |                        | 0.146           |                        | 0.003*          |                        | 0.012*          |

|                           |                   |         |                   |         |                    |         |
|---------------------------|-------------------|---------|-------------------|---------|--------------------|---------|
| Male                      | 3.41 (3.01, 3.80) |         | 4.92 (4.44, 5.40) |         | 8.31 (7.51, 9.10)  |         |
| Female                    | 3.79 (3.45, 4.13) |         | 5.85 (5.46, 6.24) |         | 9.62 (8.96, 10.28) |         |
| <b>Nationality</b>        |                   | <0.001* |                   | <0.001* |                    | <0.001* |
| Qatari                    | 2.71 (2.25, 3.18) |         | 4.63 (4.03, 5.23) |         | 7.30 (6.33, 8.27)  |         |
| Arab                      | 4.20 (3.85, 4.54) |         | 5.81 (5.42, 6.21) |         | 9.99 (9.33, 10.65) |         |
| Non-Arab**                | 3.30 (2.71, 3.89) |         | 5.42 (4.67, 6.16) |         | 8.72 (7.48, 9.95)  |         |
| <b>Marital status</b>     |                   | 0.846   |                   | 0.668   |                    | 0.651   |
| Married                   | 3.63 (3.35, 3.92) |         | 5.46 (5.12, 5.80) |         | 9.08 (8.52, 9.64)  |         |
| Non-married <sup>§</sup>  | 3.56 (2.90, 4.22) |         | 5.26 (4.54, 5.98) |         | 8.73 (7.47, 9.99)  |         |
| <b>Level of education</b> |                   | <0.001* |                   | 0.003*  |                    | <0.001* |
| No formal education       | 2.00 (1.45, 2.55) |         | 4.07 (3.22, 4.92) |         | 6.01 (4.73, 7.30)  |         |
| Primary                   | 3.55 (2.95, 4.15) |         | 5.72 (5.12, 6.32) |         | 9.27 (8.21, 10.32) |         |
| Secondary                 | 3.61 (3.10, 4.13) |         | 5.80 (5.15, 6.45) |         | 9.42 (8.39, 10.45) |         |
| Diploma/university        | 4.26 (3.86, 4.65) |         | 5.58 (5.10, 6.06) |         | 9.81 (8.99, 10.62) |         |
| <b>Employment</b>         |                   | 0.319   |                   | 0.04*   |                    | 0.083   |
| Employed                  | 3.49 (3.08, 3.90) |         | 5.09 (4.61, 5.58) |         | 8.56 (7.75, 9.37)  |         |
| Unemployed                | 3.75 (3.43, 4.08) |         | 5.74 (5.35, 6.13) |         | 9.47 (8.82, 10.12) |         |

\* Statistically significant at  $p \leq 0.05$ .

\*\* Non-Arab includes Asian, Western and African

§ Non-married (single, divorced, or widow)

## Predictors of colorectal cancer awareness

Table 4 shows the predictors of the total awareness score (out of 100) based on a multiple linear regression model of the aforementioned significant variables from the bivariate analysis. Significant associations were detected between the CRC mean awareness score and gender (higher awareness among females), nationality (higher awareness among non-Qatari Arab), and education (higher awareness among those with Diploma or university degree).

**Table 4:** The predictors of overall awareness regarding colorectal cancer among the study participants (n=448)

| Variables entered in model | $\beta$ - Coefficient | 95% C.I.     | <i>p</i> -value |
|----------------------------|-----------------------|--------------|-----------------|
| <b>Gender</b>              |                       |              | <0.0001*        |
| Male (referent)            | 1.00                  | 1.00         |                 |
| Female                     | 13.5                  | (8.3, 18.7)  |                 |
| <b>Nationality</b>         |                       |              | <0.0001*        |
| Qatari (referent)          | 1.00                  | 1.00         |                 |
| Non-Qatari Arab            | 13.8                  | (7.5, 20.0)  |                 |
| Non-Arab                   | 8.0                   | (0.65, 15.3) |                 |

| <b>Education</b>            |      |              | <0.0001* |
|-----------------------------|------|--------------|----------|
| No formal school (referent) | 1.00 | 1.00         |          |
| Up to secondary level       | 16.3 | (8.9, 23.7)  |          |
| Diploma/university level    | 20.5 | (13.0, 28.0) |          |

233 Dependent variable: Overall awareness mean score (out of 100). Enter multiple linear regression applied.

234 Model assumption is fulfilled. No interactions and no multi-collinearity were detected. R<sup>2</sup>= 14.0%.

235 C.I.: Confidence Interval

236 \*Statistically significant at p < 0.05.

237

## 238 **DISCUSSION**

239 The current study represents the first to assess the awareness regarding CRC symptoms and risk  
240 factors among a high-risk population in the State of Qatar.

241 The study revealed a poor awareness about CRC symptoms (40%), risk factors (49.3%), and in  
242 general (45.2%). Another key finding was that the female gender, non-Qatari Arab nationality, and  
243 having any formal education are significant predictors of higher CRC awareness.

244 The decreased awareness about the symptoms and risk factors of CRC among the study  
245 participants are similar to findings from earlier studies in the region. A study conducted by Nasaif  
246 and Al Qallaf in Bahrain among the general population revealed similar yet slightly higher  
247 awareness about the symptoms (59%) and risk factors (51%) of CRC.<sup>14</sup> Also, a recent national  
248 study in the Kingdom of Saudi Arabia among 5732 participants examined the awareness of  
249 respondents on CRC-related symptoms, risk factors, types, and screening tests. As a result, the  
250 mean score of the participants' awareness was low at 11.05/26.<sup>15</sup> In addition, the results of the  
251 current study are comparable to findings of international studies. A population survey in the United  
252 Kingdom has revealed a low awareness regarding multiple bowel cancer signs and risk factors.  
253 The participants showed low awareness about the association between certain lifestyle behaviors  
254 and the risk of CRC.<sup>13</sup> Another cross-sectional survey of patients attending a tertiary outpatient  
255 clinic in the Nation of Brunei revealed that the mean knowledge scores for CRC symptoms (21.6%)



1  
2  
3 256 and risk factors (12%) were poor.<sup>16</sup> Subsequently, such low level of awareness might translate  
4  
5 257 into a decreased uptake of screening among the target population.<sup>15</sup> On the other hand, a  
6  
7 258 telephone-based survey among American residents in South Carolina described a high level of  
8  
9 259 awareness regarding CRC despite a relatively low uptake of bowel cancer screening.<sup>17</sup>

11  
12 260 One more significant finding was that the female gender, non-Qatari Arab nationality, and having  
13  
14 261 any formal education were significant predictors for higher CRC awareness. Such results correlate  
15  
16 262 well with an earlier regional study among individuals aged  $\geq 50$  years-old in the United Arab  
17  
18 263 Emirates. As a result, it was found that the male gender and low level of education were significant  
19  
20 264 predictors of low awareness about the risk factors as well as signs and symptoms of bowel cancer.

21  
22 265 <sup>18</sup> Also, a survey of more than ten thousand participants in Hong Kong revealed that the male  
23  
24 266 gender was associated with low awareness about bowel cancer symptoms and risk factors.<sup>19</sup> On  
25  
26 267 the other hand, a community-based survey in Jordan reported no significant gender association  
27  
28 268 with the knowledge of CRC, where both men and women had low knowledge scores.<sup>20</sup> In addition,  
29  
30 269 a cross-sectional study among hospital employees aged 50 years and above in Greece revealed that  
31  
32 270 university education was the sole independent determinant of bowel cancer screening.<sup>21</sup>

33  
34 271 The current study has several strengths and limitations. First of all, the study was the first of its  
35  
36 272 kind to evaluate the CRC awareness and its predictors among a high-risk population in the State  
37  
38 273 of Qatar. The study achieved a high response rate (87%) and the sample included a variety of  
39  
40 274 nationalities that represents the diversity of the community in Qatar. In addition, the use of a  
41  
42 275 validated questionnaire to collect data from the target population strengthen the validity of the  
43  
44 276 study. However, the research at hand was not without limitation. Recruiting the participants from  
45  
46 277 healthcare settings may over-estimate the awareness level of CRC, as it's expected that those  
47  
48 278 participants would have better awareness than those who don't seek healthcare services. In  
49  
50  
51  
52  
53  
54  
55  
56  
57  
58  
59

1  
2  
3 279 addition, the non-probability sampling method utilized in the study may affect the generalizability  
4  
5 280 of the results.  
6  
7

## 8 281 **CONCLUSION**

9  
10 282 In conclusion, the present study has shown a decreased awareness regarding the symptoms, signs,  
11  
12 283 and risk factors of CRC among the elderly population in Qatar. Given the presence of earlier  
13  
14 284 awareness campaigns on bowel cancer in Qatar, the observed awareness among the elderly  
15  
16 285 population in the current study underlines the importance of tailoring future educational campaigns  
17  
18 286 that are relevant, specific (special focus on the association between certain lifestyle behaviours and  
19  
20 287 CRC), and appealing to such cohort (especially the nationals). Also, any planned intervention to  
21  
22 288 heighten the elderly's awareness of CRC as well as its national screening program must be based  
23  
24 289 on local evidence of the status quo and rely on an effective engagement of this population, given  
25  
26 290 the delicate nature of any public health message related to such disease.  
27  
28  
29

## 31 291 **Acknowledgments**

32  
33  
34 292 None.  
35  
36

## 37 293 **Competing Interests**

38  
39 294 The authors declare no conflict of interest.  
40  
41

## 42 295 **Funding**

43  
44 296 This study was approved was funded by the Research Department of the Primary Health Care  
45  
46 297 Corporation under protocol ID (PHCC/RC/18/05/001).  
47  
48

## 49 298 **Ethical**

50  
51  
52 299 This study was approved by the Institutional Review Board of the Primary Health Care  
53  
54 300 Corporation under protocol ID (PHCC/RC/18/05/001).  
55  
56  
57  
58  
59  
60

1  
2  
3 301 **Author contributorship**

4  
5 302 AA, MC, and MB contributed to the conception and planning of the research. AA conducted the  
6  
7 303 analysis. All authors contributed equally to the conduct and reporting of the work described in the  
8  
9 304 article.

10  
11  
12 305 **Data sharing**

13  
14 306 All data relevant to the study are included in the article.

15  
16  
17 307 **References**

- 18  
19 308 **1.** World Health Organization. Cancer [Internet]. 2018 [cited 24 November 2018]. Available  
20 309 from: <http://www.who.int/news-room/fact-sheets/detail/cancer>.
- 21  
22 310 **2.** Center MM, Jemal A, Smith RA, et al. Worldwide variations in colorectal cancer. *CA Cancer J*  
23 311 *Clin* 2009;59:366–78.
- 24  
25 312 **3.** Edwards BK, Ward E, Kohler BA, Ehemann C, Zauber AG, Anderson RN, et al. Annual report  
26 313 to the nation on the status of cancer, 1975-2006, featuring colorectal cancer trends and impact of  
27 314 interventions (risk factors, screening, and treatment) to reduce future rates. *Cancer*.  
28 315 2010;116:544–73.
- 29  
30 316 **4.** World Cancer Research Fund/American Institute for Cancer Research. Diet, Nutrition,  
31 317 Physical Activity and Cancer: a Global Perspective. Continuous Update Project Expert Report  
32 318 2018. Washington DC: AICR; 2018.
- 33  
34 319 **5.** Marley A, Nan H. Epidemiology of colorectal cancer. *Int J Mol Epidemiol Genet*.  
35 320 2016;7(3):105–114.
- 36  
37 321 **6.** World Cancer Research Fund (WCRF)/American Institute for Cancer Research, “Cancer  
38 322 preventability estimates for body fatness,” WCRF International, 2013, Available from:  
39 323 <http://www.wcrf-uk.org/uk/preventing-cancer/cancer-preventability-statistics/bowel-cancer>.
- 40  
41 324 **7.** Tseng TS, Holt CL, Shipp M, et al. Predictors of colorectal cancer knowledge and screening  
42 325 among church-attending African Americans and Whites in the Deep South. *J Community Health*.  
43 326 2009;34(2):90–97
- 44  
45 327 **8.** Post DM, Katz ML, Tatum C, Dickinson SL, Lemeshow S, Paskett ED. Determinants of  
46 328 colorectal cancer screening in primary care. *J Cancer Educ*. 2008;23(4):241–247.
- 47  
48 329 **9.** Power E, Van Jaarsveld CH, McCaffery K, Miles A, Atkin W, Wardle J. Understanding  
49 330 intentions and action in colorectal cancer screening. *Ann Behav Med*. 2008;35(3):285–294.
- 50  
51  
52  
53  
54  
55  
56  
57  
58  
59  
60

- 1  
2  
3 331 **10.** Anderson A, Caswell S, Macleod M, Craigie A, Stead M, Steele R et al. Awareness of  
4 332 Lifestyle and Colorectal Cancer Risk: Findings from the BeWEL Study. *BioMed Research*  
5 333 *International*. 2015;2015:1-5.  
6  
7 334 **11.** Ministry of Public Health. *Achieving Excellence in Cancer Care: A Vision for 2022. The*  
8 335 *National Cancer Framework 2017-2022*. Doha: Ministry of Public Health; 2017.  
9  
10 336 **12.** Ministry of Public Health. *National Health Strategy 2012-2017 | Ministry of Public Health*  
11 337 *[Internet]*. Moph.gov.qa. [cited 20 December 2018]. Available from:  
12 338 <https://www.moph.gov.qa/health-strategies-n-frameworks/national-health-strategy-2012-2017>  
13  
14  
15 339 **13.** Power E, Simon A, Juszczuk D, Hiom S, Wardle J. Assessing awareness of colorectal cancer  
16 340 symptoms: Measure development and results from a population survey in the UK. *BMC Cancer*.  
17 341 2011;11(1).  
18  
19 342 **14.** Nasaif H, Al Qallaf S. Knowledge of Colorectal Cancer Symptoms and Risk Factors in the  
20 343 Kingdom of Bahrain: a Cross- Sectional Study. *Asian Pacific Journal of Cancer Prevention*.  
21 344 2018;19(8):2299-2304.  
22  
23 345 **15.** Almadi M, Alghamdi F. The gap between knowledge and undergoing colorectal cancer  
24 346 screening using the Health Belief Model: A national survey. *Saudi Journal of Gastroenterology*.  
25 347 2019;25(1):27-39.  
26  
27 348 **16.** Chong V, Lim A, Baharudin H, Tan J, Chong C. Poor Knowledge of Colorectal Cancer in  
28 349 Brunei Darussalam. *Asian Pacific Journal of Cancer Prevention*. 2015;16(9):3927-3930.  
29  
30 350 **17.** Brandt H, Dolinger H, Sharpe P, Hardin J, Berger F. Relationship of colorectal cancer  
31 351 awareness and knowledge with colorectal cancer screening. *Colorectal Cancer*. 2012;1(5):383-  
32 352 396.  
33  
34 353 **18.** Al-Sharbatti S, Muttappallymyalil J, Sreedharan J, Almosawy Y. Predictors of Colorectal  
35 354 Cancer Knowledge among Adults in the United Arab Emirates. *Asian Pacific Journal of Cancer*  
36 355 *Prevention*. 2017;18(9):2355–2359.  
37  
38 356 **19.** Wong M, Hirai H, Luk A, Lam T, Ching J, Griffiths S et al. The Knowledge of Colorectal  
39 357 Cancer Symptoms and Risk Factors among 10,078 Screening Participants: Are High Risk  
40 358 Individuals More Knowledgeable?. *PLoS ONE*. 2013;8(4):e60366.  
41  
42 359 **20.** Michopoulos S, Manios E, Kourkoutas H, Argyriou K, Leonidakis G, Zampeli E et al.  
43 360 Predictors of colorectal cancer screening awareness among people working in a hospital  
44 361 environment. *Annals of Gastroenterology*. 2017;30(3):315–321.  
45  
46 362 **21.** Taha H, Jaghbeer M, Shteivi M, AlKhalidi S, Berggren V. Knowledge and Perceptions about  
47 363 Colorectal Cancer in Jordan. *Asian Pacific Journal of Cancer Prevention*. 2016;16(18):8479-  
48 364 8486.  
49  
50  
51  
52  
53  
54  
55  
56  
57  
58  
59  
60

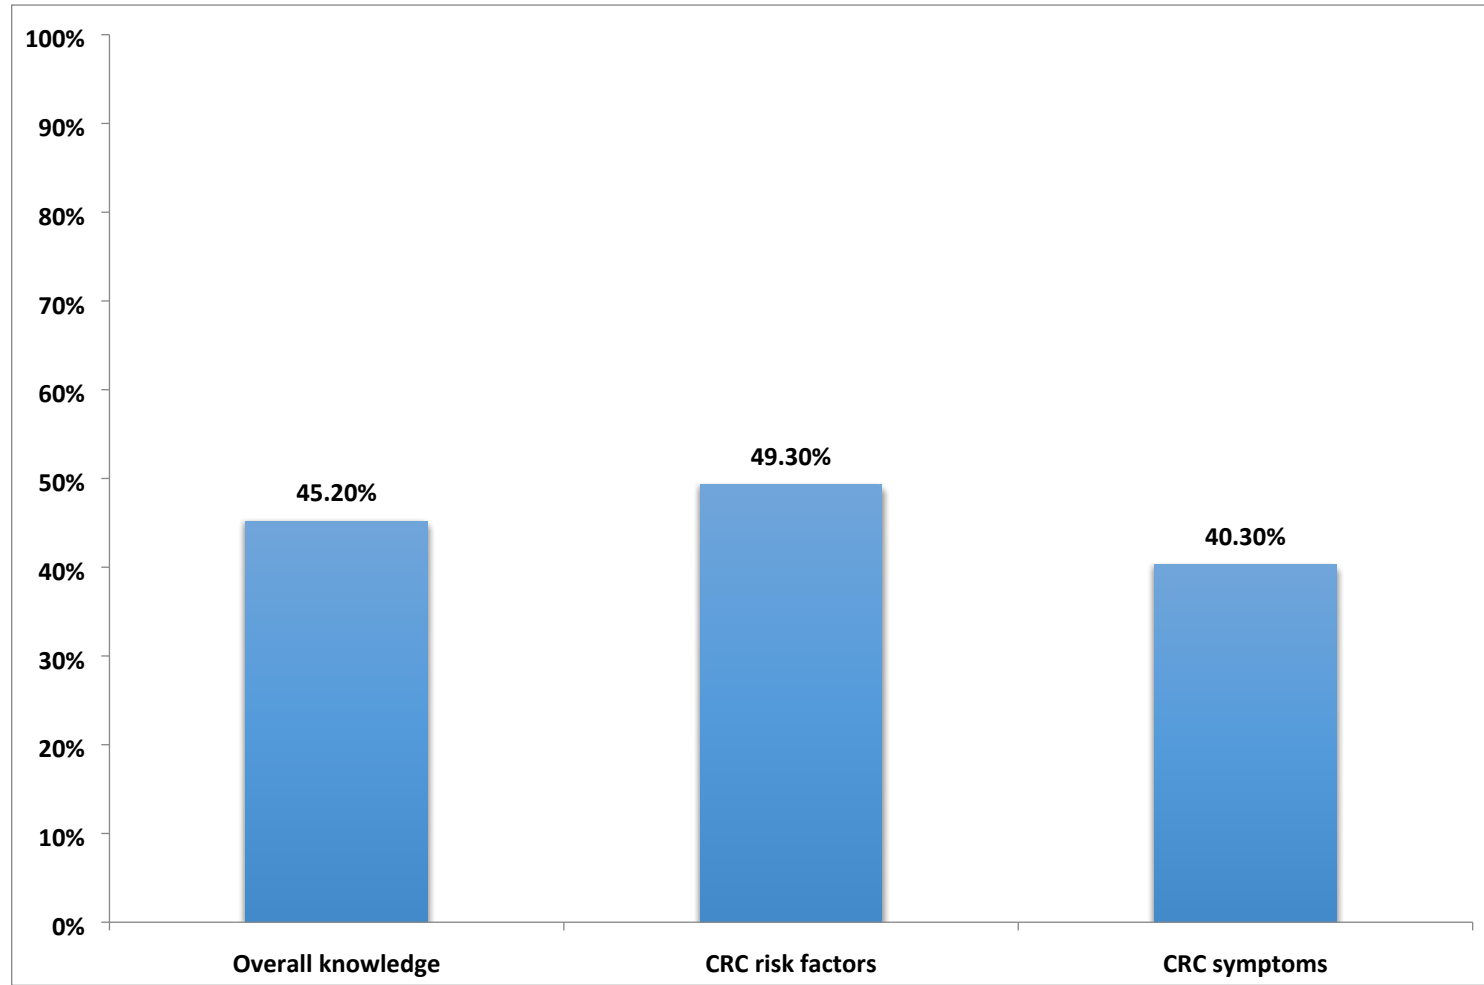

**Figure 1.** Mean score (%) of CRC awareness components (overall, symptoms, risk factor)

**STROBE 2007 (v4) Statement—Checklist of items that should be included in reports of *cross-sectional studies***

| Section/Topic                | Item # | Recommendation                                                                                                                                                                       | Reported on page # |
|------------------------------|--------|--------------------------------------------------------------------------------------------------------------------------------------------------------------------------------------|--------------------|
| <b>Title and abstract</b>    | 1      | (a) Indicate the study's design with a commonly used term in the title or the abstract                                                                                               | 1-2                |
|                              |        | (b) Provide in the abstract an informative and balanced summary of what was done and what was found                                                                                  | 2                  |
| <b>Introduction</b>          |        |                                                                                                                                                                                      |                    |
| Background/rationale         | 2      | Explain the scientific background and rationale for the investigation being reported                                                                                                 |                    |
| Objectives                   | 3      | State specific objectives, including any prespecified hypotheses                                                                                                                     | 4-5                |
| <b>Methods</b>               |        |                                                                                                                                                                                      |                    |
| Study design                 | 4      | Present key elements of study design early in the paper                                                                                                                              | 6                  |
| Setting                      | 5      | Describe the setting, locations, and relevant dates, including periods of recruitment, exposure, follow-up, and data collection                                                      | 6                  |
| Participants                 | 6      | (a) Give the eligibility criteria, and the sources and methods of selection of participants                                                                                          | 6                  |
| Variables                    | 7      | Clearly define all outcomes, exposures, predictors, potential confounders, and effect modifiers. Give diagnostic criteria, if applicable                                             | 7-8                |
| Data sources/<br>measurement | 8*     | For each variable of interest, give sources of data and details of methods of assessment (measurement). Describe comparability of assessment methods if there is more than one group | 7-8                |
| Bias                         | 9      | Describe any efforts to address potential sources of bias                                                                                                                            | 7-8                |
| Study size                   | 10     | Explain how the study size was arrived at                                                                                                                                            | 6                  |
| Quantitative variables       | 11     | Explain how quantitative variables were handled in the analyses. If applicable, describe which groupings were chosen and why                                                         | 8-9                |
| Statistical methods          | 12     | (a) Describe all statistical methods, including those used to control for confounding                                                                                                | 8-9                |
|                              |        | (b) Describe any methods used to examine subgroups and interactions                                                                                                                  | 8-9                |
|                              |        | (c) Explain how missing data were addressed                                                                                                                                          | 8-9                |
|                              |        | (d) If applicable, describe analytical methods taking account of sampling strategy                                                                                                   | N/A                |
|                              |        | (e) Describe any sensitivity analyses                                                                                                                                                | N/A                |
| <b>Results</b>               |        |                                                                                                                                                                                      |                    |

|                          |     |                                                                                                                                                                                                              |       |
|--------------------------|-----|--------------------------------------------------------------------------------------------------------------------------------------------------------------------------------------------------------------|-------|
| Participants             | 13* | (a) Report numbers of individuals at each stage of study—eg numbers potentially eligible, examined for eligibility, confirmed eligible, included in the study, completing follow-up, and analysed            | 9     |
|                          |     | (b) Give reasons for non-participation at each stage                                                                                                                                                         | N/A   |
|                          |     | (c) Consider use of a flow diagram                                                                                                                                                                           | N/A   |
| Descriptive data         | 14* | (a) Give characteristics of study participants (eg demographic, clinical, social) and information on exposures and potential confounders                                                                     | 9     |
|                          |     | (b) Indicate number of participants with missing data for each variable of interest                                                                                                                          | 11    |
| Outcome data             | 15* | Report numbers of outcome events or summary measures                                                                                                                                                         | 10    |
| Main results             | 16  | (a) Give unadjusted estimates and, if applicable, confounder-adjusted estimates and their precision (eg, 95% confidence interval). Make clear which confounders were adjusted for and why they were included | 10-13 |
|                          |     | (b) Report category boundaries when continuous variables were categorized                                                                                                                                    | 10-13 |
|                          |     | (c) If relevant, consider translating estimates of relative risk into absolute risk for a meaningful time period                                                                                             | N/A   |
| Other analyses           | 17  | Report other analyses done—eg analyses of subgroups and interactions, and sensitivity analyses                                                                                                               | 12-13 |
| <b>Discussion</b>        |     |                                                                                                                                                                                                              |       |
| Key results              | 18  | Summarise key results with reference to study objectives                                                                                                                                                     | 13-14 |
| Limitations              | 19  | Discuss limitations of the study, taking into account sources of potential bias or imprecision. Discuss both direction and magnitude of any potential bias                                                   | 15-16 |
| Interpretation           | 20  | Give a cautious overall interpretation of results considering objectives, limitations, multiplicity of analyses, results from similar studies, and other relevant evidence                                   | 16    |
| Generalisability         | 21  | Discuss the generalisability (external validity) of the study results                                                                                                                                        | 15-16 |
| <b>Other information</b> |     |                                                                                                                                                                                                              |       |
| Funding                  | 22  | Give the source of funding and the role of the funders for the present study and, if applicable, for the original study on which the present article is based                                                | 16    |

\*Give information separately for cases and controls in case-control studies and, if applicable, for exposed and unexposed groups in cohort and cross-sectional studies.

**Note:** An Explanation and Elaboration article discusses each checklist item and gives methodological background and published examples of transparent reporting. The STROBE checklist is best used in conjunction with this article (freely available on the Web sites of PLoS Medicine at <http://www.plosmedicine.org/>, Annals of Internal Medicine at <http://www.annals.org/>, and Epidemiology at <http://www.epidem.com/>). Information on the STROBE Initiative is available at [www.strobe-statement.org](http://www.strobe-statement.org).

# BMJ Open

## Colorectal cancer awareness and its predictors among adults aged 50 to 74 years attending primary health care in the State of Qatar: a cross-sectional study

|                                 |                                                                                                                                                                                                                                                                                                                                                                                                      |
|---------------------------------|------------------------------------------------------------------------------------------------------------------------------------------------------------------------------------------------------------------------------------------------------------------------------------------------------------------------------------------------------------------------------------------------------|
| Journal:                        | <i>BMJ Open</i>                                                                                                                                                                                                                                                                                                                                                                                      |
| Manuscript ID                   | bmjopen-2019-035651.R1                                                                                                                                                                                                                                                                                                                                                                               |
| Article Type:                   | Original research                                                                                                                                                                                                                                                                                                                                                                                    |
| Date Submitted by the Author:   | 03-Mar-2020                                                                                                                                                                                                                                                                                                                                                                                          |
| Complete List of Authors:       | AL DAHSHAN, AYMAN; Hamad Medical Corporation Department of Medical Education, Chehab, Mohamad; Hamad Medical Corp, Community Medicine Bala, Mohamed; Hamad Medical Corporation, Omer , Mieaad ; Hamad Medical Corporation, Community medicine AlMohamed, Omayma; Primary Health Care Corporation Al-Kubaisi, Noora; Primary Health Care Corporation, clinical affairs Selim, Nagah; Cairo University |
| <b>Primary Subject Heading</b>: | Public health                                                                                                                                                                                                                                                                                                                                                                                        |
| Secondary Subject Heading:      | Gastroenterology and hepatology                                                                                                                                                                                                                                                                                                                                                                      |
| Keywords:                       | EPIDEMIOLOGY, Gastrointestinal tumours < GASTROENTEROLOGY, PRIMARY CARE, PREVENTIVE MEDICINE, PUBLIC HEALTH                                                                                                                                                                                                                                                                                          |
|                                 |                                                                                                                                                                                                                                                                                                                                                                                                      |

SCHOLARONE™  
Manuscripts





I, the Submitting Author has the right to grant and does grant on behalf of all authors of the Work (as defined in the below author licence), an exclusive licence and/or a non-exclusive licence for contributions from authors who are: i) UK Crown employees; ii) where BMJ has agreed a CC-BY licence shall apply, and/or iii) in accordance with the terms applicable for US Federal Government officers or employees acting as part of their official duties; on a worldwide, perpetual, irrevocable, royalty-free basis to BMJ Publishing Group Ltd ("BMJ") its licensees and where the relevant Journal is co-owned by BMJ to the co-owners of the Journal, to publish the Work in this journal and any other BMJ products and to exploit all rights, as set out in our [licence](#).

The Submitting Author accepts and understands that any supply made under these terms is made by BMJ to the Submitting Author unless you are acting as an employee on behalf of your employer or a postgraduate student of an affiliated institution which is paying any applicable article publishing charge ("APC") for Open Access articles. Where the Submitting Author wishes to make the Work available on an Open Access basis (and intends to pay the relevant APC), the terms of reuse of such Open Access shall be governed by a Creative Commons licence – details of these licences and which [Creative Commons](#) licence will apply to this Work are set out in our licence referred to above.

Other than as permitted in any relevant BMJ Author's Self Archiving Policies, I confirm this Work has not been accepted for publication elsewhere, is not being considered for publication elsewhere and does not duplicate material already published. I confirm all authors consent to publication of this Work and authorise the granting of this licence.

1  
2  
3 1 **A Colorectal cancer awareness and its predictors among adults aged 50 to 74 years**  
4  
5 2 **attending primary health care in the State of Qatar: a cross-sectional study**  
6  
7

8 3 Ayman Al-Dahshan <sup>(1)\*</sup>, Mohamad Chehab <sup>(1)</sup>, Mohamed Bala <sup>(1)</sup>, Mieaad Omer <sup>(1)</sup>, Omayma  
9  
4 AlMohamed <sup>(2)</sup>, Noora Al-Kubaisi <sup>(2)</sup>, Nagah Selim <sup>(2,3)</sup>  
11  
12

13 5 **1:** Community Medicine Residency Program, Hamad Medical Corporation, Doha, Qatar;

14  
15 6 [Ayman.aldahshan@hotmail.com](mailto:Ayman.aldahshan@hotmail.com); [mchehab2@hamad.qa](mailto:mchehab2@hamad.qa); [mbala@hamad.qa](mailto:mbala@hamad.qa);

16  
17 7 [mieaad1@hotmail.com](mailto:mieaad1@hotmail.com).  
18  
19

20  
21 8 **2:** Primary Health Care Corporation, Doha, Qatar; [omsalmohd@phcc.gov.qa](mailto:omsalmohd@phcc.gov.qa);

22  
23 9 [njalkubaisi@phcc.gov.qa](mailto:njalkubaisi@phcc.gov.qa); [nselim@phcc.gov.qa](mailto:nselim@phcc.gov.qa).  
24

25 10 **3:** Department of Public Health, Faculty of Medicine, Cairo University, Cairo, Egypt  
26  
27

28  
29  
30 12 **\*: Corresponding author:** Dr. Ayman Al-Dahshan, Community Medicine Residency Program,

31  
32 13 Department of Medical Education, Hamad Medical Corporation, Doha, Qatar. P.O. Box 3050;

33  
34 14 Email: [Ayman.aldahshan@hotmail.com](mailto:Ayman.aldahshan@hotmail.com)  
35  
36

37  
38 15 Word count: 2293  
39  
40

1  
2  
3 **23 Abstract**  
4

5 **24 Objective:** The current study aimed to assess the awareness of colorectal cancer (CRC) symptoms  
6  
7  
8 **25** and risk factors among the at-risk population. The secondary objective was to assess the  
9  
10 **26** differences in awareness among population subgroups.

11  
12  
13 **27 Design:** A cross-sectional study design was employed.  
14  
15

16 **28 Setting:** The study was conducted across 6 primary healthcare (PHC) centres in Qatar.  
17  
18

19 **29 Participants:** Patients, or their accompanying people, aged 50-74 years and Arabic or English  
20  
21 **30** speakers, were recruited from the main waiting areas of the selected PHC centres.  
22  
23

24 **31 Data collection and analysis:** Participants were interviewed using the validated Bowel/Colorectal  
25  
26 **32** Cancer Awareness Measure (Bowel/Colorectal CAM) questionnaire. A non-probability  
27  
28 **33** convenient sampling technique was applied to recruit participants. Data were analyzed using SPSS  
29  
30 **34** version 23. Descriptive and analytic statistics were utilized when appropriate. A multivariate linear  
31  
32 **35** regression model was constructed to identify the independent predictors of CRC awareness.  
33  
34  
35

36 **36 Results:** The study includes 448 participants (response rate= 87%). The mean age of the  
37  
38 **37** participants was 58.48 years (SD  $\pm$  6.37). The mean awareness score among the participants was  
39  
40 **38** 3.63 /9 (SD  $\pm$ 2.7) for CRC symptoms and 5.43/11 (SD  $\pm$ 3.3) for CRC risk factors. The overall  
41  
42 **39** mean awareness score was 9.03/20 (SD  $\pm$ 5.5). Multivariate linear regression identified the female  
43  
44 **40** gender (B=2.6;  $P \leq 0.001$ ), non-Qatari or non-Arab nationalities (B= 2.81 and 1.6;  $P \leq 0.001$ ), and  
45  
46 **41** educational level (B=3.02 to 4.08;  $P \leq 0.001$ ) as independent predictors of higher CRC awareness.  
47  
48  
49  
50

51 **42 Conclusion:** In conclusion, the present study has shown low awareness regarding the symptoms  
52  
53 **43** and risk factors of CRC. Such results emphasize the importance of tailoring future educational  
54  
55 **44** campaigns that are relevant, specific, and appealing to such cohort.  
56  
57  
58  
59  
60

## 45 **Strengths and limitations of this study**

- 46 • This was the first cross-sectional study to evaluate CRC awareness and its predictors  
47 among the population at risk in Qatar.
- 48 • The use of a validated questionnaire to collect data from the target population strengthened  
49 the validity of the study.
- 50 • The interviews were conducted using a structured face-to-face interview by trained data  
51 collectors.
- 52 • The non-probability sampling method utilized in the study may affect the generalizability  
53 of the results.
- 54 • Despite not being a population-based study, the current research recruited participants from  
55 PHC centres and offers a good representation of the different ethnic, cultural, and social  
56 backgrounds in Qatar.

57 **Keywords:** colorectal cancer; awareness; symptoms; risk factors

## 67 INTRODUCTION

68 Colorectal cancer (CRC) is the third-most commonly diagnosed cancer and the second leading  
69 cause of cancer-related deaths worldwide. CRC accounted for almost 1.8 million new cases and  
70 860,000 deaths during 2018. By 2030, the global burden of CRC is expected to increase by 60%  
71 and results in more than 2.2 million new cases and 1.1 million deaths. <sup>1</sup> In addition, there has been  
72 a rapid rise of CRC incidence and mortality across several middle-to-high income countries in  
73 Asia, Eastern Europe, and South America. <sup>2</sup> On the other hand, a decline in CRC-related mortality  
74 has been witnessed among western countries; partly attributed to their effective national screening  
75 programs. <sup>3</sup>

76 Like other non-communicable diseases, CRC has modifiable risk factors such as obesity, low-fibre  
77 diet, low fruit and vegetable intake, consumption of red or processed meat, excessive alcohol  
78 intake, and smoking. Moreover, detectable symptoms of CRC include a persistent change of the  
79 normal bowel habits, bleeding through the back passage, feeling a lump in the abdomen, and  
80 unexplained extreme tiredness. <sup>4</sup>

81 The incidence of CRC can be reduced through a comprehensive approach that entails dietary  
82 modifications, regular physical activity, and family- or community-based interventions for cancer  
83 prevention. <sup>5</sup> For instance, it has been estimated that more than a quarter (27%) of CRC cases could  
84 have been prevented through increasing the intake of fibre and decreasing the consumption of red  
85 or processed meat. In addition, almost one-seventh (14%) and one-fifth (12%) of CRC cases could  
86 have been avoided through the proper management of excess weight. <sup>6</sup> Thus, the awareness about  
87 these modifiable risk factors is crucial for any public health strategies aimed at the reduction or  
88 prevention of CRC.

1  
2  
3 89 Several studies have shown that the awareness of CRC symptoms and risk factors is positively  
4  
5 90 linked to the uptake of CRC screening.<sup>7,8,9</sup> Despite growing evidence on the association between  
6  
7 91 lifestyle factors and CRC, the awareness of such risk factors among the population at risk (aged  
8  
9 92 50-74 years old) remains low.<sup>10</sup>

11  
12 93 Qatar is a country located in Western Asia on the Arabian Peninsula. The population in Qatar is  
13  
14 94 largely diverse and comprised of many ethnicities; Arabs, Asians, Africans and westerns). The  
15  
16 95 majority of the country's workforce are expatriates with different cultural and educational  
17  
18 96 backgrounds.<sup>11</sup>

19  
20  
21  
22 97 In Qatar, the latest data shows that CRC is the second most commonly diagnosed cancer (11.71%)  
23  
24 98 among males and the third most commonly diagnosed cancer (8.63%) among females, Moreover,  
25  
26 99 more than two-thirds (68%) of the relevant cases were diagnosed at an advanced stage.<sup>12</sup> In 2016,  
27  
28  
29 100 Qatar launched its national colorectal cancer screening program. The program is a population-  
30  
31 101 based initiative that aims at promoting education, awareness, and early detection of bowel cancer  
32  
33 102 among those at risk (aged 50-74 years).<sup>13</sup> It is in line with the Public Health Strategy 2017-2022  
34  
35 103 which focuses on preventive and community-based care.<sup>14</sup> Given the diverse population of the  
36  
37 104 country, heterogeneous knowledge regarding CRC is expected. Thus, the primary objective of the  
38  
39 105 current study was to assess the awareness of CRC symptoms and risk factors among individuals  
40  
41 106 at risk. The secondary objective was to assess the differences in awareness among population  
42  
43 107 subgroups.

## 44 45 46 47 48 108 **METHODS**

### 49 50 51 109 **Study design and setting**

52  
53 110 This was a cross-sectional study conducted at the primary healthcare (PHC) centres in Qatar  
54  
55 111 between September 2018 and January 2019. A network of PHC centres is distributed across the

1  
2  
3 112 country through which a comprehensive promotive, preventive, and curative care is provided free  
4  
5 113 of charge. They are the first line of contact with the community and each health centre has a well-  
6  
7 114 defined catchment population from different ethnic, cultural, social and educational backgrounds;  
8  
9 115 which offers a good representation of the community. At the time of the study, there were 23 PHC  
10  
11 116 centres distributed across the country's 3 administrative health regions (North, West, and Central).  
12  
13  
14 117 The study was conducted across 6 PHC centres, where two health centres were chosen from each  
15  
16 118 region.

### 18 119 **Study population and sampling**

20  
21 120 The inclusion criteria were patients or accompanying people, aged 50-74 years, Arabic or English  
22  
23 121 speakers, visiting one of the selected PHC centres during the study period. The study excluded  
24  
25 122 individuals who previously underwent CRC screening because they have already received  
26  
27 123 counselling about CRC symptoms and risk factors as part of their CRC screening procedure. Thus,  
28  
29 124 their enrollment would interfere with the study main objective. Individuals with cognitive/  
30  
31 125 communication difficulties were excluded. The participants were chosen through a non-probability  
32  
33 126 convenient sampling technique.  
34  
35

### 37 127 **Patient and public involvement**

38  
39  
40 128 We did not involve patients or the public in our work.  
41  
42

### 43 129 **Sample size**

44  
45 130 According to Qatar's 2015 Census, there were 211,207 individuals aged 50 years and above in the  
46  
47 131 country. Thus, the estimated sample size was 384 individuals based on a 95% confidence interval,  
48  
49 132 precision of 5%, a hypothesis that 50% (+/-5%) of participants were aware of CRC symptoms and  
50  
51 133 risk factors and a non-response of 20%.  
52  
53  
54

### 55 134 **Data collection**

56  
57  
58  
59  
60

1  
2  
3 135 The data collection was done through face-to-face structured interviews using the questionnaire  
4  
5 136 described below. The eligible participants were approached by trained interviewers (resident  
6  
7 137 physicians) at the main waiting areas of the selected PHC centres. After that, they were given a  
8  
9 138 brief orientation about the study and invited to participate. All consenting individuals were  
10  
11 139 interviewed in their preferred language (English or Arabic). The duration of the interview ranged  
12  
13  
14 140 from 15 to 20 minutes. Upon completing the interview, the participants were encouraged to ask  
15  
16 141 any questions. They were provided with an educational booklet on CRC. Additionally, all  
17  
18 142 participants were counselled about CRC and encouraged to take part in bowel cancer screening.  
19  
20  
21 143 Those who reported any concerns or potential symptoms of bowel cancer were referred to their  
22  
23 144 primary care physician for further assessment.

## 24 25 26 145 **Questionnaire**

27  
28 146 The current study utilized the validated Bowel/Colorectal Cancer Awareness Measure  
29  
30 147 (Bowel/Colorectal CAM) survey. The questionnaire was designed to evaluate the awareness of  
31  
32 148 CRC among the public. This survey instrument was developed by University College London and  
33  
34 149 Cancer Research United Kingdom (UK). It is based on a generic CAM developed by Cancer  
35  
36 150 Research UK, University College London, Kings College London and Oxford University in 2007-  
37  
38 151 08.<sup>15</sup> It possesses satisfactory internal reliability with a Cronbach's alpha of 0.84 across all  
39  
40 152 components and test-retest reliability of  $r = 0.7$ . The questionnaire is composed of prompted  
41  
42 153 (closed-ended) and unprompted (open-ended) questions. However, we used the prompted section  
43  
44 154 of the questionnaire because it satisfies the study's objectives. Further details about the  
45  
46 155 questionnaire have been described elsewhere.<sup>16</sup>

47  
48  
49  
50  
51 156 The study's questionnaire was translated and back-translated (English-Arabic) by two independent  
52  
53 157 translators and any aberrancy was corrected accordingly. Additionally, one item on tobacco use



1  
2  
3 158 was added to the list of CRC risk factors. The study questionnaire consisted of three main sections.  
4  
5 159 Section A included 6 questions about the background characteristics (age, gender, nationality,  
6  
7 160 marital status, level of education, employment status). Section B consisted of 9 closed-ended  
8  
9 161 questions that measure the participants' awareness of CRC symptoms. Section C encompassed 11  
10  
11 162 closed-ended questions related to the participants' awareness of CRC risk factors. Regarding  
12  
13  
14 163 sections B and C, the researchers assigned one point for each "correct" response and null for the  
15  
16 164 "incorrect or I don't know" responses. As a result, the total score ranged from 0 to 9 for section B  
17  
18 165 and 0 to 11 for section C. Furthermore, the overall awareness score ranged from 0 to 20 by  
19  
20  
21 166 combining the scores of sections B and C. The instrument was piloted on 30 participants from the  
22  
23 167 study population to assess its comprehensiveness and clarity.

## 168 **Statistical analysis**

169 The collected data were analyzed using the Statistical Package for the Social Sciences-SPSS  
170  
171 version 23. Descriptive statistics were calculated for continuous and categorical variables where  
172  
173 appropriate. Pearson's chi-squared test was used to assess the association between categorical  
174  
175 variables. ANOVA test was used to analyse the differences among group means in the sample. A  
176  
177 multivariate linear regression model was constructed to identify the independent predictors of CRC  
178  
179 awareness and tested for interactions and collinearity. Unstandardized beta coefficients were  
180  
181 reported for each predictor. The level of statistical significance was set at 0.05.

## 176 **RESULTS**

### 177 **Demographic characteristics**

178 A total of 448 participants were enrolled in the study (response rate: 87%) with time constraint  
179  
180 being the main reason for non-participation. Table 1 presents the participants' background  
181  
182 characteristics. The participants' mean age was 58.48 years (SD±6.37). More than half of the

181 respondents were females (53.5%), non-Qatari Arabs (52.2%), married (86.8%), and unemployed  
 182 (54.4%).

183 **Table 1:** Background characteristics of participants (n=448)

| Variable                  | N (%)      |
|---------------------------|------------|
| <b>Age</b>                |            |
| 50-59                     | 254 (56.7) |
| 60 or more                | 194 (43.3) |
| <b>Gender</b>             |            |
| Male                      | 208 (46.5) |
| Female                    | 239 (53.5) |
| <b>Nationality</b>        |            |
| Qatari                    | 107 (24)   |
| Non-Qatari Arab           | 233 (52.2) |
| Non-Arab*                 | 106 (23.8) |
| <b>Marital status</b>     |            |
| Married                   | 389 (86.8) |
| Divorced/Widow            | 51 (11.4)  |
| Single                    | 8 (1.8)    |
| <b>Level of education</b> |            |
| No formal education       | 69 (15.4)  |
| Primary                   | 82 (18.3)  |
| Secondary                 | 101 (22.6) |
| Diploma or University     | 195 (43.6) |
| <b>Employment</b>         |            |
| Employed                  | 204(45.6)  |
| Unemployed                | 243(54.4)  |

184 \* Non-Arab includes Asian, Western and African

### 185 **Awareness of colorectal cancer symptoms and risk factors**

186 The mean awareness score of CRC symptoms among study participants was 3.63 /9 (SD ±2.7),  
 187 while that of risk factors was 5.43/11 (SD ±3.3). Thus, the overall mean awareness score was  
 188 9.03/20 (SD ±5.5).

189 Table 2 describes the percentages of participants who identified the symptoms and risk factors of  
 190 CRC. Out of 9 symptoms related to CRC, the most commonly recognised symptoms were “lump  
 191 in abdomen” (56.5 %), “unexplained weight loss” (54.5 %), and “blood in stool” (46.9%). On the

192 other hand, the least commonly recognised symptoms were “pain in back passage” (22.5%) and  
 193 “bowel doesn’t empty” (27.9%).

194 Furthermore, the most commonly recognised CRC risk factors were the “daily eating of processed  
 195 meat” (71.7%), “tobacco use” (69.2%), and “alcohol use” (63.6 %). However, “diabetes” (23.7 %)  
 196 and “low fruit and vegetables” (34.4%) were less commonly recognised risk factors.

197 **Table 2:** Frequency distribution regarding the awareness of colorectal cancer symptoms and risk  
 198 factors among participants (n=448)

| CRC symptoms                                  | % (n)      |
|-----------------------------------------------|------------|
| Lump in abdomen                               | 56.5 (253) |
| Unexplained weight loss                       | 54.5 (244) |
| Blood in stools                               | 46.9 (210) |
| Pain in abdomen                               | 42.2 (189) |
| Change in bowel habit                         | 38.6 (173) |
| Bleeding back passage                         | 38.2 (171) |
| Tiredness                                     | 35.3 (158) |
| Bowel does not empty                          | 27.9 (125) |
| Pain in back passage                          | 22.5 (101) |
| CRC risk factors                              | % (n)      |
| Daily eating of processed meat                | 71.7 (321) |
| Tobacco use                                   | 69.2 (310) |
| Drinking Alcohol                              | 63.6 (285) |
| Chronic bowel disease                         | 54 (242)   |
| Daily eating of red meat                      | 53.3 (239) |
| Close relative with CRC                       | 46 (206)   |
| Diet low in fibre                             | 45.5 (204) |
| Overweight (BMI $\geq$ 25 kg/m <sup>2</sup> ) | 41.7 (187) |
| Older age                                     | 37.7 (169) |
| Low fruit & vegetables (<5 servings/day)      | 34.4 (154) |
| Diabetes                                      | 23.7 (106) |

199  
 200 Females were more likely to recognise the link between unhealthy lifestyle behaviours and CRC  
 201 than their male counterparts as shown in table 3. For instance, females were more aware about the  
 202 association of CRC with the following factors: daily consumption of processed meat (76.5% vs.

66.7%;  $P = 0.01$ ), tobacco use (74.8% vs. 63.6%;  $P = 0.007$ ), drinking alcohol (69.3% vs. 57.8%;  $P = 0.008$ ), and daily consumption of red meat (62.6% vs. 43.0%;  $P < 0.001$ ).

**Table 3:** The relationship between gender and awareness of lifestyle risk factors for colorectal cancer (n=448)

| Lifestyle risk factor                         | Female % (n) | Male % (n) | X <sup>2</sup> value | p-value |
|-----------------------------------------------|--------------|------------|----------------------|---------|
| Daily eating of processed meat                | 76.5 (182)   | 66.7 (138) | 5.26                 | 0.014*  |
| Tobacco use                                   | 74.8 (178)   | 63.6 (131) | 6.54                 | 0.007*  |
| Drinking alcohol                              | 69.3 (165)   | 57.8 (119) | 6.40                 | 0.008*  |
| Daily eating of red meat                      | 62.6 (149)   | 43.0 (89)  | 17.11                | <0.001* |
| Low fruit & vegetables (<5 servings/day)      | 46.2 (110)   | 20.9 (43)  | 31.40                | <0.001* |
| Diet low in fibre                             | 47.5 (113)   | 43.7 (90)  | 0.63                 | 0.24    |
| Overweight (BMI $\geq$ 25 kg/m <sup>2</sup> ) | 39.9 (95)    | 44.2 (91)  | 0.82                 | 0.20    |

BMI: Body Mass Index

\* Statistically significant at  $p \leq 0.05$ .

**The relationship between background characteristics and the CRC awareness mean score**

Table 4 describes the relationship between the participants' background characteristics and their CRC awareness mean score. Upon bivariate analyses, the respondents' gender, nationality, and educational level were significantly associated with the component (symptoms, risk factors) and overall awareness scores ( $P < 0.05$ ).

**Table 4:** The association between participants' background characteristics and their awareness regarding CRC symptoms, risk factors and overall. (n=448)

| Variable      | Awareness           |         |                     |         | Overall awareness   |         |
|---------------|---------------------|---------|---------------------|---------|---------------------|---------|
|               | Symptoms            |         | Risk factors        |         | Mean score (95% CI) | p-value |
|               | Mean score (95% CI) | p-value | Mean score (95% CI) | p-value |                     |         |
| <b>Age</b>    |                     | 0.201   |                     | 0.082   |                     | 0.075   |
| 50-59         | 3.77 (3.42, 4.12)   |         | 5.67 (5.26, 6.08)   |         | 9.44 (8.76, 10.12)  |         |
| 60 or more    | 3.43 (3.05, 3.82)   |         | 5.12 (4.65, 5.59)   |         | 8.50 (7.72, 9.28)   |         |
| <b>Gender</b> |                     | 0.146   |                     | 0.003*  |                     | 0.012*  |
| Male          | 3.41 (3.01, 3.80)   |         | 4.92 (4.44, 5.40)   |         | 8.31 (7.51, 9.10)   |         |
| Female        | 3.79 (3.45, 4.13)   |         | 5.85 (5.46, 6.24)   |         | 9.62 (8.96, 10.28)  |         |

|                           |                   |         |                   |         |                    |         |
|---------------------------|-------------------|---------|-------------------|---------|--------------------|---------|
| <b>Nationality</b>        |                   | <0.001* |                   | <0.001* |                    | <0.001* |
| Qatari                    | 2.71 (2.25, 3.18) |         | 4.63 (4.03, 5.23) |         | 7.30 (6.33, 8.27)  |         |
| Non-Qatari Arab           | 4.20 (3.85, 4.54) |         | 5.81 (5.42, 6.21) |         | 9.99 (9.33, 10.65) |         |
| Non-Arab <sup>a</sup>     | 3.30 (2.71, 3.89) |         | 5.42 (4.67, 6.16) |         | 8.72 (7.48, 9.95)  |         |
| <b>Marital status</b>     |                   | 0.846   |                   | 0.668   |                    | 0.651   |
| Married                   | 3.63 (3.35, 3.92) |         | 5.46 (5.12, 5.80) |         | 9.08 (8.52, 9.64)  |         |
| Non-married <sup>b</sup>  | 3.56 (2.90, 4.22) |         | 5.26 (4.54, 5.98) |         | 8.73 (7.47, 9.99)  |         |
| <b>Level of education</b> |                   | <0.001* |                   | 0.003*  |                    | <0.001* |
| No formal education       | 2.00 (1.45, 2.55) |         | 4.07 (3.22, 4.92) |         | 6.01 (4.73, 7.30)  |         |
| Primary                   | 3.55 (2.95, 4.15) |         | 5.72 (5.12, 6.32) |         | 9.27 (8.21, 10.32) |         |
| Secondary                 | 3.61 (3.10, 4.13) |         | 5.80 (5.15, 6.45) |         | 9.42 (8.39, 10.45) |         |
| Diploma/university        | 4.26 (3.86, 4.65) |         | 5.58 (5.10, 6.06) |         | 9.81 (8.99, 10.62) |         |
| <b>Employment</b>         |                   | 0.319   |                   | 0.04*   |                    | 0.083   |
| Employed                  | 3.49 (3.08, 3.90) |         | 5.09 (4.61, 5.58) |         | 8.56 (7.75, 9.37)  |         |
| Unemployed                | 3.75 (3.43, 4.08) |         | 5.74 (5.35, 6.13) |         | 9.47 (8.82, 10.12) |         |

\* Statistically significant at  $p \leq 0.05$ .

<sup>a</sup> Non-Arab includes Asian, Western and African

<sup>b</sup> Non-married (single, divorced, or widow)

## Predictors of colorectal cancer awareness

Multivariate linear regression identified the following predictors of higher overall CRC awareness: female gender ( $B=2.6$ ;  $P \leq 0.001$ ), non-Qatari or non-Arab nationalities ( $B= 2.81$  or  $1.6$ ;  $P \leq 0.001$ ), and educational level ( $B=3.02$  to  $4.08$ ;  $P \leq 0.001$ ) (table 5).

**Table 5:** The predictors of overall awareness of colorectal cancer among the study participants (n=448)

| Variables entered in the model | Unstandardized beta coefficient | Standardized beta coefficient | (95% CI)      | p-value |
|--------------------------------|---------------------------------|-------------------------------|---------------|---------|
| <b>Gender</b>                  |                                 |                               |               | <0.001* |
| Male (referent)                | 1.00                            | 1.00                          | 1.00          |         |
| Female                         | 2.60                            | 0.24                          | (1.66 - 3.76) |         |
| <b>Nationality</b>             |                                 |                               |               | <0.001* |
| Qatari (referent)              | 1.00                            | 1.00                          | 1.00          |         |
| Non-Qatari Arab                | 2.81                            | 0.25                          | (1.54 - 4.08) |         |
| Non-Arab                       | 1.62                            | 0.12                          | (0.15- 3.08)  |         |
| <b>Level of education</b>      |                                 |                               |               | <0.001* |
| No formal school (referent)    | 1.00                            | 1.00                          | 1.00          |         |
| Primary                        | 3.51                            | 0.24                          | (1.83 – 5.20) |         |
| Secondary                      | 3.02                            | 0.22                          | (1.37 – 4.67) |         |
| Diploma/university             | 4.08                            | 0.36                          | (2.57 – 5.59) |         |

Dependent variable: Overall awareness mean score. Enter multiple linear regression applied.

Model assumption is fulfilled. No interactions and no multi-collinearity were detected.  $R^2= 14.0\%$ .

CI= Confidence Interval.

229 \*Statistically significant at  $p < 0.05$ .

230

## 231 **DISCUSSION**

232 This is the first study to assess the awareness of CRC symptoms and risk factors among adults aged  
233 50 to 74 years in Qatar. The mean awareness score of CRC symptoms among study participants  
234 was 3.63 /9 (SD  $\pm 2.7$ ), while that of risk factors was 5.43/11 (SD  $\pm 3.3$ ). Thus, the overall mean  
235 awareness score was 9.03/20 (SD  $\pm 5.5$ ).

236 This is in line with earlier studies in the region. A study in Bahrain among the general population  
237 revealed low awareness about the symptoms and risk factors of CRC.<sup>17</sup> Also, a recent national  
238 study in Saudi Arabia examined the awareness of 5732 participants on CRC-related symptoms and  
239 risk factors. As a result, the mean score of the respondents' awareness was low at 11.05/23.<sup>18</sup>

240 In comparison to our study, a population survey in the United Kingdom using the bowel/colorectal  
241 CAM instrument showed higher awareness regarding CRC symptoms and risk factors.  
242 Specifically, the most recognised symptom and risk factor in the British study were "blood in  
243 stools" (88.6%) and "close relative with bowel cancer" (65%). However, our study identified  
244 "lump in abdomen" (56.5%) and "daily eating of processed meat" (71%) to be the most recognised  
245 symptom and risk factor. The least recognised symptom in the UK study was "bowel does not  
246 empty" (47%). On the other hand, "pain in back passage" (22.5%) was the least recognised  
247 symptom in our study. "Diabetes" was the least recognised risk factor in both studies and was  
248 recalled by only a quarter of the participants.<sup>16</sup> The level of education among our study population  
249 (43.6% with a diploma/university) was higher than that of the UK study (25.6%). However, this  
250 observation did not reflect on the level of CRC awareness. Subsequently, the level of education  
251 may not be associated with the level of health literacy. The observed difference in the awareness  
252 might be explained by the relatively recent introduction of the national bowel cancer screening  
253 program and awareness campaigns in Qatar.

1  
2  
3 254 Another survey in Malaysia, using the bowel/colorectal CAM tool, revealed lower CRC awareness  
4  
5 255 in comparison to our findings. In the Malaysian study, the mean awareness scores for CRC  
6  
7 256 symptoms and risk factors was 2.89 (SD 2.96) and 3.49 (SD 3.17).<sup>19</sup> This could be explained by  
8  
9 257 the difference in the study settings and the characteristics of the participants.

11  
12 258 The present study identified the female gender and formal education as significant predictors of  
13  
14 259 higher CRC awareness. Such results are in line with findings of a regional study conducted in the  
15  
16 260 United Arab Emirates.<sup>20</sup> Another survey of more than 10,000 participants in Hong Kong revealed  
17  
18 261 that male gender was associated with low CRC awareness.<sup>21</sup> On the other hand, a study in Saudi  
19  
20 262 Arabia and a community-based survey in Jordan reported no significant association between  
21  
22 263 gender and knowledge of CRC. <sup>(18, 22)</sup>

23  
24  
25  
26  
27 264 The current study has strengths and limitations. First, the study was the first of its kind to evaluate  
28  
29 265 CRC awareness and its predictors among the at-risk population in Qatar. The study achieved a  
30  
31 266 high response rate (87%) and the sample included a variety of nationalities that represents the  
32  
33 267 diversity of the community in Qatar. In addition, the use of a validated questionnaire through face-  
34  
35 268 to-face interviews by trained data collectors strengthened the validity of the study results.  
36  
37 269 However, the research has some limitations. First, we did not use the unprompted (open-ended)  
38  
39 270 items of the CAM questionnaire to satisfy the study's objectives and due to time constraint.  
40  
41 271 Secondly, we did not assess the participants' family history for CRC. Lastly, the non-probability  
42  
43 272 sampling method utilized in the study may affect the generalizability of the results.

## 44 45 46 47 48 273 **CONCLUSION**

49  
50 274 In conclusion, the awareness of CRC symptoms and risk factors was low among the at-risk  
51  
52 275 population in Qatar. This underlines the importance of tailoring future educational campaigns that

276 are relevant, specific (with focus on the male gender and those with low education) and are based  
277 on local evidence and effective engagement of the target population.

## 278 **Acknowledgements**

279 We would like to acknowledge Dr. Eman Radwan for her effort in reviewing the manuscript.

## 280 **Competing Interests**

281 The authors declare no conflict of interest.

## 282 **Funding**

283 This study was funded by the Research Department of the Primary Health Care Corporation under  
284 protocol ID (PHCC/RC/18/05/001).

## 285 **Ethics**

286 This study was approved by the Institutional Review Board of the Primary Health Care  
287 Corporation under protocol ID (PHCC/RC/18/05/001).

## 288 **Contributors**

289 AA conceived and designed the study. AA, MC, MB, MO and OA contributed to the recruitment  
290 of the participants and to the acquisition of the data. AA analysed the data. NS and NA contributed  
291 to the design of the work and interpretation of the findings. AA, MC, MB evaluated the results and  
292 wrote the manuscript. All authors revised and approved the final manuscript.

## 293 **Data availability**

294 Data are available upon reasonable request.

## 295 **References**

- 296 **1.** World Health Organization. Cancer [Internet]. 2018 [cited 24 November 2018]. Available  
297 from: <http://www.who.int/news-room/fact-sheets/detail/cancer>.
- 298 **2.** Center MM, Jemal A, Smith RA, et al. Worldwide variations in colorectal cancer. *CA Cancer J*  
299 *Clin.* 2009 Nov-Dec;59(6):366–78.



- 1  
2  
3 300 **3.** Edwards BK, Ward E, Kohler BA, Ehemann C, Zauber AG, Anderson RN, et al. Annual report  
4 301 to the nation on the status of cancer, 1975-2006, featuring colorectal cancer trends and impact of  
5 302 interventions (risk factors, screening, and treatment) to reduce future rates. *Cancer*. 2010 Feb 1;  
6 303 116(3):544–73.
- 8  
9 304 **4.** World Cancer Research Fund/American Institute for Cancer Research. Diet, Nutrition,  
10 305 Physical Activity and Cancer: A Global Perspective. Continuous Update Project Expert Report  
11 306 2018. Washington DC: AICR; 2018.
- 13  
14 307 **5.** Marley A, Nan H. Epidemiology of colorectal cancer. *Int J Mol Epidemiol Genet*. 2016 Sep  
15 308 30;7(3):105–114.
- 16  
17 309 **6.** World Cancer Research Fund (WCRF)/American Institute for Cancer Research, “Cancer  
18 310 preventability estimates for body fatness,” WCRF International, 2013, Available from:  
19 311 <http://www.wcrf-uk.org/uk/preventing-cancer/cancer-preventability-statistics/bowel-cancer>.
- 21  
22 312 **7.** Tseng TS, Holt CL, Shipp M, et al. Predictors of colorectal cancer knowledge and screening  
23 313 among church-attending African Americans and Whites in the Deep South. *J Community Health*.  
24 314 2009 Apr;34(2):90–7
- 25  
26 315 **8.** Post DM, Katz ML, Tatum C, Dickinson SL, Lemeshow S, Paskett ED. Determinants of  
27 316 colorectal cancer screening in primary care. *J Cancer Educ*. 2008;23(4):241–47.
- 29  
30 317 **9.** Power E, Van Jaarsveld CH, McCaffery K, Miles A, Atkin W, Wardle J. Understanding  
31 318 intentions and action in colorectal cancer screening. *Ann Behav Med*. 2008 Jun;35(3):285–294.
- 32  
33 319 **10.** Anderson A, Caswell S, Macleod M, Craigie A, Stead M, Steele R et al. Awareness of  
34 320 Lifestyle and Colorectal Cancer Risk: Findings from the BeWEL Study. *BioMed Res Int*. 2015  
35 321 Oct; 2015:1-5.
- 37  
38 322 **11.** Qatar Population and Expat Nationalities [Internet]. Onlineqatar.com. 2019 [cited 23  
39 323 February 2020]. Available from: [https://www.onlineqatar.com/visiting/tourist-information/qatar-](https://www.onlineqatar.com/visiting/tourist-information/qatar-population-and-expat-nationalities)  
40 324 [population-and-expat-nationalities](https://www.onlineqatar.com/visiting/tourist-information/qatar-population-and-expat-nationalities)
- 41  
42 325 **12.** Qatar National Cancer Registry, Annual report 2015 [Internet]. Doha: Ministry of Public  
43 326 Health; 2017 [cited 14 February 2020]. Available from:  
44 327 [https://www.moph.gov.qa/Admin/Lists/PublicationsAttachments/Attachments/53/QNCR-2015-](https://www.moph.gov.qa/Admin/Lists/PublicationsAttachments/Attachments/53/QNCR-2015-English.pdf)  
45 328 [English.pdf](https://www.moph.gov.qa/Admin/Lists/PublicationsAttachments/Attachments/53/QNCR-2015-English.pdf)
- 47  
48 329 **13.** Ministry of Public Health. Achieving Excellence in Cancer Care: A Vision for 2022. The  
49 330 National Cancer Framework 2017-2022. Doha: Ministry of Public Health; 2017.
- 51  
52 331 **14.** Ministry of Public Health. National Health Strategy 2012-2017 | Ministry of Public Health  
53 332 [Internet]. Moph.gov.qa. [cited 20 December 2018]. Available from:  
54 333 <https://www.moph.gov.qa/health-strategies-n-frameworks/national-health-strategy-2012-2017>

- 1  
2  
3 334 **15.** The Cancer Awareness Measures (CAM) [Internet]. Cancer Research UK. [cited 14 February  
4 335 2020]. Available from: [https://www.cancerresearchuk.org/health-professional/awareness-and-](https://www.cancerresearchuk.org/health-professional/awareness-and-prevention/the-cancer-awareness-measures-cam#CAM_Use0)  
5 336 [prevention/the-cancer-awareness-measures-cam#CAM\\_Use0](https://www.cancerresearchuk.org/health-professional/awareness-and-prevention/the-cancer-awareness-measures-cam#CAM_Use0)  
6
- 7 337 **16.** Power E, Simon A, Juszczuk D, Hiom S, Wardle J. Assessing awareness of colorectal cancer  
8 338 symptoms: Measure development and results from a population survey in the UK. *BMC Cancer*.  
9 339 2011 Aug 23;11(366):1-10.
- 11 340 **17.** Nasaif H, Al Qallaf S. Knowledge of Colorectal Cancer Symptoms and Risk Factors in the  
12 341 Kingdom of Bahrain: A Cross- Sectional Study. *Asian Pac J Cancer Prev*. 2018 Aug  
13 342 24;19(8):2299-2304.
- 16 343 **18.** Almadi M, Alghamdi F. The gap between knowledge and undergoing colorectal cancer  
17 344 screening using the Health Belief Model: A national survey. *Saudi J Gastroenterol*. 2019 Jan-  
18 345 Feb;25(1):27-39.
- 21 346 **19.** Su T, Goh J, Tan J, Muhaimah A, Pigeneswaren Y, Khairun N et al. Level of colorectal  
22 347 cancer awareness: a cross sectional exploratory study among multi-ethnic rural population in  
23 348 Malaysia. *BMC Cancer*. 2013 Aug 7;13(376):1-8.
- 25 349 **20.** Al-Sharbatti S, Muttappallymyalil J, Sreedharan J, Almosawy Y. Predictors of Colorectal  
26 350 Cancer Knowledge among Adults in the United Arab Emirates. *Asian Pac J Cancer Prev*.  
27 351 2017;18(9):2355–2359.
- 30 352 **21.** Wong M, Hirai H, Luk A, Lam T, Ching J, Griffiths S et al. The Knowledge of Colorectal  
31 353 Cancer Symptoms and Risk Factors among 10,078 Screening Participants: Are High Risk  
32 354 Individuals More Knowledgeable? *PLoS ONE*. 2013 April 3;8(4):e60366.
- 35 355 **22.** Taha H, Jaghbeer M, Shteivi M, AlKhalidi S, Berggren V. Knowledge and Perceptions about  
36 356 Colorectal Cancer in Jordan. *Asian Pac J Cancer Prev*. 2016;16(18):8479-8486.
- 37  
38  
39  
40  
41  
42  
43  
44  
45  
46  
47  
48  
49  
50  
51  
52  
53  
54  
55  
56  
57  
58  
59  
60

**STROBE 2007 (v4) Statement—Checklist of items that should be included in reports of *cross-sectional studies***

| Section/Topic                | Item # | Recommendation                                                                                                                                                                       | Reported on page # |
|------------------------------|--------|--------------------------------------------------------------------------------------------------------------------------------------------------------------------------------------|--------------------|
| <b>Title and abstract</b>    | 1      | (a) Indicate the study's design with a commonly used term in the title or the abstract                                                                                               | 1-2                |
|                              |        | (b) Provide in the abstract an informative and balanced summary of what was done and what was found                                                                                  | 2                  |
| <b>Introduction</b>          |        |                                                                                                                                                                                      |                    |
| Background/rationale         | 2      | Explain the scientific background and rationale for the investigation being reported                                                                                                 | 4-5                |
| Objectives                   | 3      | State specific objectives, including any prespecified hypotheses                                                                                                                     | 5                  |
| <b>Methods</b>               |        |                                                                                                                                                                                      |                    |
| Study design                 | 4      | Present key elements of study design early in the paper                                                                                                                              | 5-6                |
| Setting                      | 5      | Describe the setting, locations, and relevant dates, including periods of recruitment, exposure, follow-up, and data collection                                                      | 5-6                |
| Participants                 | 6      | (a) Give the eligibility criteria, and the sources and methods of selection of participants                                                                                          | 6                  |
| Variables                    | 7      | Clearly define all outcomes, exposures, predictors, potential confounders, and effect modifiers. Give diagnostic criteria, if applicable                                             | 7-8                |
| Data sources/<br>measurement | 8*     | For each variable of interest, give sources of data and details of methods of assessment (measurement). Describe comparability of assessment methods if there is more than one group | 7-8                |
| Bias                         | 9      | Describe any efforts to address potential sources of bias                                                                                                                            | 7                  |
| Study size                   | 10     | Explain how the study size was arrived at                                                                                                                                            | 6                  |
| Quantitative variables       | 11     | Explain how quantitative variables were handled in the analyses. If applicable, describe which groupings were chosen and why                                                         | 8                  |
| Statistical methods          | 12     | (a) Describe all statistical methods, including those used to control for confounding                                                                                                | 8                  |
|                              |        | (b) Describe any methods used to examine subgroups and interactions                                                                                                                  | 8                  |
|                              |        | (c) Explain how missing data were addressed                                                                                                                                          | N/A                |
|                              |        | (d) If applicable, describe analytical methods taking account of sampling strategy                                                                                                   | N/A                |
|                              |        | (e) Describe any sensitivity analyses                                                                                                                                                | N/A                |
| <b>Results</b>               |        |                                                                                                                                                                                      |                    |

|                          |     |                                                                                                                                                                                                              |       |
|--------------------------|-----|--------------------------------------------------------------------------------------------------------------------------------------------------------------------------------------------------------------|-------|
| Participants             | 13* | (a) Report numbers of individuals at each stage of study—eg numbers potentially eligible, examined for eligibility, confirmed eligible, included in the study, completing follow-up, and analysed            | 8     |
|                          |     | (b) Give reasons for non-participation at each stage                                                                                                                                                         | 8     |
|                          |     | (c) Consider use of a flow diagram                                                                                                                                                                           | N/A   |
| Descriptive data         | 14* | (a) Give characteristics of study participants (eg demographic, clinical, social) and information on exposures and potential confounders                                                                     | 9     |
|                          |     | (b) Indicate number of participants with missing data for each variable of interest                                                                                                                          | N/A   |
| Outcome data             | 15* | Report numbers of outcome events or summary measures                                                                                                                                                         | 9-10  |
| Main results             | 16  | (a) Give unadjusted estimates and, if applicable, confounder-adjusted estimates and their precision (eg, 95% confidence interval). Make clear which confounders were adjusted for and why they were included | 12-13 |
|                          |     | (b) Report category boundaries when continuous variables were categorized                                                                                                                                    | 11-13 |
|                          |     | (c) If relevant, consider translating estimates of relative risk into absolute risk for a meaningful time period                                                                                             | N/A   |
| Other analyses           | 17  | Report other analyses done—eg analyses of subgroups and interactions, and sensitivity analyses                                                                                                               | 11-12 |
| <b>Discussion</b>        |     |                                                                                                                                                                                                              |       |
| Key results              | 18  | Summarise key results with reference to study objectives                                                                                                                                                     | 13    |
| Limitations              | 19  | Discuss limitations of the study, taking into account sources of potential bias or imprecision. Discuss both direction and magnitude of any potential bias                                                   | 14-15 |
| Interpretation           | 20  | Give a cautious overall interpretation of results considering objectives, limitations, multiplicity of analyses, results from similar studies, and other relevant evidence                                   | 14-15 |
| Generalisability         | 21  | Discuss the generalisability (external validity) of the study results                                                                                                                                        | 15    |
| <b>Other information</b> |     |                                                                                                                                                                                                              |       |
| Funding                  | 22  | Give the source of funding and the role of the funders for the present study and, if applicable, for the original study on which the present article is based                                                | 15    |

\*Give information separately for cases and controls in case-control studies and, if applicable, for exposed and unexposed groups in cohort and cross-sectional studies.

**Note:** An Explanation and Elaboration article discusses each checklist item and gives methodological background and published examples of transparent reporting. The STROBE checklist is best used in conjunction with this article (freely available on the Web sites of PLoS Medicine at <http://www.plosmedicine.org/>, Annals of Internal Medicine at <http://www.annals.org/>, and Epidemiology at <http://www.epidem.com/>). Information on the STROBE Initiative is available at [www.strobe-statement.org](http://www.strobe-statement.org).

# BMJ Open

## Colorectal cancer awareness and its predictors among adults aged 50 to 74 years attending primary health care in the State of Qatar: a cross-sectional study

|                                 |                                                                                                                                                                                                                                                                                                                                                                                                      |
|---------------------------------|------------------------------------------------------------------------------------------------------------------------------------------------------------------------------------------------------------------------------------------------------------------------------------------------------------------------------------------------------------------------------------------------------|
| Journal:                        | <i>BMJ Open</i>                                                                                                                                                                                                                                                                                                                                                                                      |
| Manuscript ID                   | bmjopen-2019-035651.R2                                                                                                                                                                                                                                                                                                                                                                               |
| Article Type:                   | Original research                                                                                                                                                                                                                                                                                                                                                                                    |
| Date Submitted by the Author:   | 20-May-2020                                                                                                                                                                                                                                                                                                                                                                                          |
| Complete List of Authors:       | AL DAHSHAN, AYMAN; Hamad Medical Corporation Department of Medical Education, Chehab, Mohamad; Hamad Medical Corp, Community Medicine Bala, Mohamed; Hamad Medical Corporation, Omer , Mieaad ; Hamad Medical Corporation, Community medicine AlMohamed, Omayma; Primary Health Care Corporation Al-Kubaisi, Noora; Primary Health Care Corporation, clinical affairs Selim, Nagah; Cairo University |
| <b>Primary Subject Heading</b>: | Public health                                                                                                                                                                                                                                                                                                                                                                                        |
| Secondary Subject Heading:      | Gastroenterology and hepatology                                                                                                                                                                                                                                                                                                                                                                      |
| Keywords:                       | EPIDEMIOLOGY, Gastrointestinal tumours < GASTROENTEROLOGY, PRIMARY CARE, PREVENTIVE MEDICINE, PUBLIC HEALTH                                                                                                                                                                                                                                                                                          |
|                                 |                                                                                                                                                                                                                                                                                                                                                                                                      |

SCHOLARONE™  
Manuscripts



I, the Submitting Author has the right to grant and does grant on behalf of all authors of the Work (as defined in the below author licence), an exclusive licence and/or a non-exclusive licence for contributions from authors who are: i) UK Crown employees; ii) where BMJ has agreed a CC-BY licence shall apply, and/or iii) in accordance with the terms applicable for US Federal Government officers or employees acting as part of their official duties; on a worldwide, perpetual, irrevocable, royalty-free basis to BMJ Publishing Group Ltd ("BMJ") its licensees and where the relevant Journal is co-owned by BMJ to the co-owners of the Journal, to publish the Work in this journal and any other BMJ products and to exploit all rights, as set out in our [licence](#).

The Submitting Author accepts and understands that any supply made under these terms is made by BMJ to the Submitting Author unless you are acting as an employee on behalf of your employer or a postgraduate student of an affiliated institution which is paying any applicable article publishing charge ("APC") for Open Access articles. Where the Submitting Author wishes to make the Work available on an Open Access basis (and intends to pay the relevant APC), the terms of reuse of such Open Access shall be governed by a Creative Commons licence – details of these licences and which [Creative Commons](#) licence will apply to this Work are set out in our licence referred to above.

Other than as permitted in any relevant BMJ Author's Self Archiving Policies, I confirm this Work has not been accepted for publication elsewhere, is not being considered for publication elsewhere and does not duplicate material already published. I confirm all authors consent to publication of this Work and authorise the granting of this licence.

1  
2  
3 1 **Colorectal cancer awareness and its predictors among adults aged 50 to 74 years attending**  
4  
5 2 **primary health care in the State of Qatar: a cross-sectional study**  
6  
7

8 3 Ayman Al-Dahshan <sup>(1)\*</sup>, Mohamad Chehab <sup>(1)</sup>, Mohamed Bala <sup>(1)</sup>, Mieaad Omer <sup>(1)</sup>, Omayma  
9  
4 AlMohamed <sup>(2)</sup>, Noora Al-Kubaisi <sup>(2)</sup>, Nagah Selim <sup>(2,3)</sup>

5 1: Community Medicine Residency Program, Hamad Medical Corporation, Doha, Qatar;

6 [Ayman.aldahshan@hotmail.com](mailto:Ayman.aldahshan@hotmail.com); [mchehab2@hamad.qa](mailto:mchehab2@hamad.qa); [mbala@hamad.qa](mailto:mbala@hamad.qa);

7 [mieaad1@hotmail.com](mailto:mieaad1@hotmail.com).

8 2: Primary Health Care Corporation, Doha, Qatar; [omsalmohd@phcc.gov.qa](mailto:omsalmohd@phcc.gov.qa);

9 [njalkubaisi@phcc.gov.qa](mailto:njalkubaisi@phcc.gov.qa); [nselim@phcc.gov.qa](mailto:nselim@phcc.gov.qa).

10 3: Department of Public Health, Faculty of Medicine, Cairo University, Cairo, Egypt

11  
12 \*: **Corresponding author:** Dr. Ayman Al-Dahshan, Community Medicine Residency Program,

13 Department of Medical Education, Hamad Medical Corporation, Doha, Qatar. P.O. Box 3050;

14 Email: [Ayman.aldahshan@hotmail.com](mailto:Ayman.aldahshan@hotmail.com)

15 Word count: 2744

1  
2  
3 **Abstract**

4  
5 **Objective:** The current study aimed to assess the awareness of colorectal cancer (CRC) symptoms  
6  
7  
8 and risk factors among the at-risk population visiting the primary healthcare (PHC) centres in  
9  
10  
11 Qatar. The secondary objective was to assess the differences in awareness among population  
12  
13 subgroups.

14  
15 **Design:** A cross-sectional study design was employed.

16  
17  
18 **Setting:** The study was conducted across six PHC centres in Qatar.

19  
20  
21 **Participants:** Patients, or their accompanying people, aged 50-74 years and Arabic or English  
22  
23  
24 speakers, were recruited from the main waiting areas of the selected PHC centres.

25  
26  
27 **Data collection and analysis:** Participants were interviewed using the validated Bowel/Colorectal  
28  
29  
30 Cancer Awareness Measure (Bowel/Colorectal CAM) questionnaire. A non-probability  
31  
32  
33 convenient sampling technique was applied to recruit participants. Descriptive and analytic  
34  
35  
36 statistics were utilized when appropriate. A multivariate linear regression model was constructed  
37  
38  
39 to identify the independent predictors of CRC awareness.

40  
41  
42 **Results:** The study includes 448 participants (response rate= 87%). The mean age of the  
43  
44  
45 participants was 58.48 years (SD  $\pm$  6.37). The mean awareness score among the participants was  
46  
47  
48 3.63 /9 (SD  $\pm$ 2.7) for CRC symptoms and 5.43/11 (SD  $\pm$ 3.3) for CRC risk factors. The overall  
49  
50  
51 mean awareness score was 9.03/20 (SD  $\pm$ 5.5). Multivariate linear regression identified the female  
52  
53  
54 gender [2.52 (95% CI: 1.15 – 3.88)], non-Qatari Arab [2.91 (95% CI: 1.64 – 4.18)] or non-Arab  
55  
56  
57 nationalities [1.76 (95% CI: 0.28 – 3.24)], and tertiary education [4.10 (95% CI: 2.55 – 5.66)] as  
58  
59  
60 independent predictors of higher CRC awareness.



1  
2  
3 44 **Conclusion:** In general, the awareness of CRC symptoms and risk factors was low among the at-  
4  
5 45 risk population in Qatar. Specifically, the regression analysis showed males, Qataris, and those  
6  
7 46 with no formal education had low awareness of CRC symptoms and risk factors. Such results  
8  
9 47 emphasize the importance of tailoring future educational campaigns that are relevant, specific, and  
10  
11 48 appealing to such cohort.  
12  
13

#### 14 15 49 **Strengths and limitations of this study**

- 16  
17  
18 50 • This was the first cross-sectional study to evaluate CRC awareness and its predictors  
19  
20 51 among the population at risk in Qatar.
- 21  
22 52 • The use of a validated questionnaire to collect data from the target population strengthened  
23  
24 53 the validity of the study.
- 25  
26  
27 54 • The interviews were conducted using a structured face-to-face interview by trained data  
28  
29 55 collectors.
- 30  
31 56 • The non-probability sampling method utilized in the study may affect the generalizability  
32  
33 57 of the results.
- 34  
35  
36 58 • Despite not being a population-based study, the current research recruited participants from  
37  
38 59 PHC centres and offers a good representation of the different ethnic, cultural, and social  
39  
40 60 backgrounds in Qatar.

41  
42  
43  
44 61 **Keywords:** colorectal cancer; awareness; symptoms; risk factors  
45  
46  
47 62  
48  
49 63  
50  
51 64  
52  
53  
54 65  
55  
56  
57  
58  
59  
60

## 66 INTRODUCTION

67 Colorectal cancer (CRC) is the third-most commonly diagnosed cancer and the second leading  
68 cause of cancer-related deaths worldwide. CRC accounted for almost 1.8 million new cases and  
69 860,000 deaths during 2018. By 2030, the global burden of CRC is expected to increase by 60%  
70 and results in more than 2.2 million new cases and 1.1 million deaths. <sup>1</sup> In addition, there has been  
71 a rapid rise of CRC incidence and mortality across several middle-to-high income countries in  
72 Asia, Eastern Europe, and South America. <sup>2</sup> On the other hand, a decline in CRC-related mortality  
73 has been witnessed among western countries; partly attributed to their effective national screening  
74 programs. <sup>3</sup>

75 Like other non-communicable diseases, CRC has modifiable risk factors such as obesity, low-fibre  
76 diet, low fruit and vegetable intake, consumption of red or processed meat, excessive alcohol  
77 intake, and smoking. Moreover, detectable symptoms of CRC include a persistent change of the  
78 normal bowel habits, bleeding through the back passage, feeling a lump in the abdomen, and  
79 unexplained extreme tiredness. <sup>4</sup>

80 The incidence of CRC can be reduced through a comprehensive approach that entails dietary  
81 modifications, regular physical activity, and family- or community-based interventions for cancer  
82 prevention. <sup>5</sup> For instance, it has been estimated that more than a quarter (27%) of CRC cases could  
83 have been prevented through increasing the intake of fibre and decreasing the consumption of red  
84 or processed meat. In addition, almost one-seventh (14%) and one-fifth (12%) of CRC cases could  
85 have been avoided through the proper management of excess weight. <sup>6</sup> Thus, the awareness about  
86 these modifiable risk factors is crucial for any public health strategies aimed at the reduction or  
87 prevention of CRC.

1  
2  
3 88 Several studies have shown that the awareness of CRC symptoms and risk factors is positively  
4  
5 89 linked to the uptake of CRC screening.<sup>7,8,9</sup> Despite growing evidence on the association between  
6  
7 90 lifestyle factors and CRC, the awareness of such risk factors among the population at risk (aged  
8  
9 91 50-74 years old) remains low.<sup>10</sup>

11  
12 92 Qatar is a country located in Western Asia on the Arabian Peninsula. The population in Qatar is  
13  
14 93 largely diverse and comprised of many ethnicities; Arabs, Asians, Africans and westerns. The  
15  
16 94 majority of the country's workforce are expatriates with different cultural and educational  
17  
18 95 backgrounds.<sup>11</sup>

19  
20  
21  
22 96 In Qatar, the latest data shows that CRC is the second most commonly diagnosed cancer (11.71%)  
23  
24 97 among males and the third most commonly diagnosed cancer (8.63%) among females. Moreover,  
25  
26 98 more than two-thirds (68%) of the relevant cases were diagnosed at an advanced stage.<sup>12</sup> Given  
27  
28 99 the diverse population of the country, heterogeneous knowledge regarding CRC is expected. Thus,  
29  
30  
31 100 the primary objective of the current study was to assess the awareness of CRC symptoms and risk  
32  
33 101 factors among the at-risk population (aged 50-74) visiting the primary health care centres in Qatar.  
34  
35  
36 102 The secondary objective was to assess the differences in awareness among population subgroups.

## 37 38 39 103 **METHODS**

### 40 41 42 104 **Study design and setting**

43  
44 105 This was a cross-sectional study conducted at the primary healthcare (PHC) centres in Qatar  
45  
46 106 between September 2018 and January 2019. A network of PHC centres is distributed across the  
47  
48 107 country through which a comprehensive promotive, preventive, and curative care is provided free  
49  
50 108 of charge. They are the first line of contact with the community and each health centre has a well-  
51  
52 109 defined catchment population from different ethnic, cultural, social and educational backgrounds;  
53  
54 110 which offers a good representation of the community. At the time of the study, there were 23 PHC  
55  
56  
57  
58  
59  
60

1  
2  
3 111 centres distributed across the country's three administrative health regions (North, West, and  
4  
5 112 Central). The study was conducted across six PHC centres, where two health centres were chosen  
6  
7 113 from each region.

### 9 114 **Study population and sampling**

11 115 The inclusion criteria were patients or accompanying people, aged 50-74 years, Arabic or English  
13 116 speakers, visiting one of the selected PHC centres during the study period. The study excluded  
15 117 individuals who previously underwent CRC screening because they have already received  
17 118 counselling about CRC symptoms and risk factors as part of their CRC screening procedure. Thus,  
19 119 their enrollment would interfere with the study main objective. Individuals with cognitive/  
21 120 communication difficulties were also excluded. The participants were chosen through a non-  
23 121 probability convenient sampling technique.

### 27 122 **Patient and public involvement**

28 123 We did not involve patients or the public in our work.

### 32 124 **Sample size**

33 125 According to Qatar's 2015 Census, there were 211,207 individuals aged 50 years and above in the  
35 126 country. Thus, the estimated sample size was 384 individuals based on a 95% confidence interval,  
37 127 precision of 5%, a hypothesis that 50% (+/-5%) of participants were aware of CRC symptoms and  
39 128 risk factors and a non-response of 20%. The calculation of sample size was performed to obtain a  
41 129 sufficiently precise estimate of the minimum number of study participants to ensure study power.

### 45 130 **Data collection**

46 131 The data collection was done through face-to-face structured interviews using the questionnaire  
48 132 described below. The eligible participants were approached by trained interviewers (resident  
50 133 physicians) at the main waiting areas of the selected PHC centres. After that, they were given a

1  
2  
3 134 brief orientation about the study and were invited to participate. All consented individuals were  
4  
5 135 interviewed in their preferred language (English or Arabic). The duration of the interview ranged  
6  
7 136 from 15 to 20 minutes. Upon completing the interview, the participants were encouraged to ask  
8  
9 137 any question. They were provided with an educational booklet on CRC prepared already by  
10  
11 138 primary health care cancer screening department. Additionally, all participants were counselled  
12  
13  
14 139 about CRC and encouraged to take part in bowel cancer screening. Those who reported any  
15  
16 140 concerns or potential symptoms of bowel cancer were referred to their primary care physician for  
17  
18 141 further assessment.

## 21 142 **Questionnaire**

22  
23  
24 143 The current study utilized the validated Bowel/Colorectal Cancer Awareness Measure  
25  
26 144 (Bowel/Colorectal CAM) survey. The questionnaire was designed to evaluate the awareness of  
27  
28 145 CRC among the public. This survey instrument was developed by University College London and  
29  
30 146 Cancer Research United Kingdom (UK). It is based on a generic CAM developed by Cancer  
31  
32 147 Research UK, University College London, Kings College London and Oxford University in 2007-  
33  
34 148 2008.<sup>13</sup> It possesses satisfactory internal reliability with a Cronbach's alpha of 0.84 across all  
35  
36 149 components and test-retest reliability of  $r = 0.7$ . The questionnaire is composed of prompted  
37  
38 150 (closed-ended) and unprompted (open-ended) questions. However, we used the prompted section  
39  
40 151 of the questionnaire because it satisfies the study's objectives. Further details about the  
41  
42 152 questionnaire have been described elsewhere.<sup>14</sup>

43  
44  
45  
46  
47 153 The study's questionnaire was translated and back-translated (English-Arabic) by two independent  
48  
49 154 translators and any aberrancy was corrected accordingly. Additionally, one item on tobacco use  
50  
51 155 was added to the list of CRC risk factors. The study questionnaire consisted of three main sections.  
52  
53 156 Section A included 6 questions about the background characteristics (age, gender, nationality,

1  
2  
3 157 marital status, level of education, employment status). Section B consisted of 9 closed-ended  
4  
5 158 questions that measure the participants' awareness of CRC symptoms. Section C encompassed 11  
6  
7 159 closed-ended questions related to the participants' awareness of CRC risk factors. Regarding  
8  
9 160 sections B and C, the researchers assigned one point for each "correct" response and null for the  
10  
11 161 "incorrect or I don't know" responses. As a result, the total score ranged from 0 to 9 for section B  
12  
13 162 and 0 to 11 for section C. Furthermore, the overall awareness score ranged from 0 to 20 by  
14  
15 163 combining the scores of sections B and C. The instrument was piloted on 30 participants from the  
16  
17 164 study population to assess its comprehensiveness and clarity.

### 21 165 **Statistical analysis**

22  
23 166 The collected data were analyzed using the Statistical Package for the Social Sciences-SPSS  
24  
25 167 version 23. Descriptive statistics were calculated for continuous and categorical variables where  
26  
27 168 appropriate. Pearson's chi-squared test was used to assess the association between categorical  
28  
29 169 variables. ANOVA test was used to analyse the differences among group means in the sample. A  
30  
31 170 multivariate linear regression model was constructed to identify the independent predictors of CRC  
32  
33 171 awareness and tested for interactions and collinearity. The unadjusted and adjusted differences in  
34  
35 172 means were reported for all potential predictors (age, gender, nationality, marital status, level of  
36  
37 173 education and employment). The level of statistical significance was set at 0.05.

## 42 174 **RESULTS**

### 45 175 **Demographic characteristics**

46  
47 176 A total of 448 out of 566 invited individuals participated in the study (response rate: 87%) with  
48  
49 177 time constraint being the main reason for non-participation. Table 1 presents the participants'  
50  
51 178 background characteristics. The participants' mean age was 58.48 years (SD±6.37). More than  
52  
53  
54  
55  
56  
57  
58  
59  
60

179 half of the respondents were females (53.5%), non-Qatari Arabs (52.2%), married (86.8%), and  
 180 unemployed (54.4%).

181 **Table 1:** Background characteristics of participants (N=448)

| Variable                  | n (%)      |
|---------------------------|------------|
| <b>Age</b>                |            |
| 50-59                     | 254 (56.7) |
| 60 or more                | 194 (43.3) |
| <b>Gender</b>             |            |
| Male                      | 208 (46.5) |
| Female                    | 239 (53.5) |
| <b>Nationality</b>        |            |
| Qatari                    | 107 (24.0) |
| Non-Qatari Arab           | 233 (52.2) |
| Non-Arab <sup>a</sup>     | 106 (23.8) |
| <b>Marital status</b>     |            |
| Married                   | 389 (86.8) |
| Divorced/Widow            | 51 (11.4)  |
| Unmarried <sup>b</sup>    | 8 (1.8)    |
| <b>Level of education</b> |            |
| No formal education       | 69 (15.4)  |
| Primary                   | 82 (18.3)  |
| Secondary                 | 101 (22.6) |
| Tertiary                  | 195 (43.6) |
| <b>Employment</b>         |            |
| Employed                  | 204 (45.6) |
| Unemployed                | 243 (54.4) |

182 Missing information: Gender (n = 1), Nationality (n = 2), Level of education (n = 1), Employment (n = 1)

183 <sup>a</sup> Non-Arab includes Asian, Western and African

184 <sup>b</sup> Unmarried (single, divorced, or widow)

### 185 **Awareness of colorectal cancer symptoms and risk factors**

186 The mean awareness score of CRC symptoms among study participants was 3.63 /9 (SD ±2.7),  
 187 while that of risk factors was 5.43/11 (SD ±3.3). Thus, the overall mean awareness score was  
 188 9.03/20 (SD ±5.5).

189 Table 2 describes the percentages of participants who identified the symptoms and risk factors of  
 190 CRC. Out of 9 symptoms related to CRC, the most commonly recognised symptoms were “lump

191 in abdomen” (56.5 %), “unexplained weight loss” (54.5 %), and “blood in stool” (46.9%). On the  
 192 other hand, the least commonly recognised symptoms were “pain in back passage” (22.5%) and  
 193 “bowel doesn’t empty” (27.9%). Furthermore, the most commonly recognised CRC risk factors  
 194 were the “daily eating of processed meat” (71.7%), “tobacco use” (69.2%), and “alcohol use” (63.6  
 195 %). However, “diabetes” (23.7 %) , “low fruit and vegetables intake” (34.4%), and “older age”  
 196 (37.7%) were less commonly recognised risk factors.

197 **Table 2:** Frequency distribution regarding the awareness of colorectal cancer symptoms and risk  
 198 factors among participants (N=448)

| CRC symptoms                                  | n (%)      |
|-----------------------------------------------|------------|
| Lump in abdomen                               | 253 (56.5) |
| Unexplained weight loss                       | 244 (54.5) |
| Blood in stools                               | 210 (46.9) |
| Pain in abdomen                               | 189 (42.2) |
| Change in bowel habit                         | 173 (38.6) |
| Bleeding back passage                         | 171 (38.2) |
| Tiredness                                     | 158 (35.3) |
| Bowel does not empty                          | 125 (27.9) |
| Pain in back passage                          | 101 (22.5) |
| CRC risk factors                              | n (%)      |
| Daily eating of processed meat                | 321 (71.7) |
| Tobacco use                                   | 310 (69.2) |
| Drinking Alcohol                              | 285 (63.6) |
| Chronic bowel disease                         | 242 (54.0) |
| Daily eating of red meat                      | 239 (53.3) |
| Close relative with CRC                       | 206 (46.0) |
| Diet low in fibre                             | 204 (45.5) |
| Overweight (BMI $\geq$ 25 kg/m <sup>2</sup> ) | 187 (41.7) |
| Older age                                     | 169 (37.7) |
| Low fruit & vegetables (<5 servings/day)      | 154 (34.4) |
| Diabetes                                      | 106 (23.7) |



199 Females were more likely to recognise the link between unhealthy lifestyle behaviours and CRC  
 200 than their male counterparts as shown in table 3. For instance, females were more aware about the  
 201 association of CRC with the following factors: daily consumption of processed meat (76.5% vs.  
 202 66.7%;  $P = 0.01$ ), tobacco use (74.8% vs. 63.6%;  $P = 0.007$ ), drinking alcohol (69.3% vs. 57.8%;  
 203  $P = 0.008$ ), and daily consumption of red meat (62.6% vs. 43.0%;  $P < 0.001$ ).

204 **Table 3:** The relationship between gender and awareness of lifestyle risk factors for colorectal  
 205 cancer (N=448)

| Lifestyle risk factor                         | Female<br>n (%) | Male<br>n (%) | <i>p</i> -value |
|-----------------------------------------------|-----------------|---------------|-----------------|
| Daily eating of processed meat                | 182 (76.5)      | 138 (66.7)    | 0.014*          |
| Tobacco use                                   | 178 (74.8)      | 131 (63.6)    | 0.007*          |
| Drinking alcohol                              | 165 (69.3)      | 119 (57.8)    | 0.008*          |
| Daily eating of red meat                      | 149 (62.6)      | 89 (43.0)     | <0.001*         |
| Low fruit & vegetables<br>(<5 servings/day)   | 110 (46.2)      | 43 (20.9)     | <0.001*         |
| Diet low in fibre                             | 113 (47.5)      | 90 (43.7)     | 0.24            |
| Overweight (BMI $\geq$ 25 kg/m <sup>2</sup> ) | 95 (39.9)       | 91 (44.2)     | 0.20            |

206 BMI: Body Mass Index

207 \* Statistically significant.

208 **The relationship between background characteristics and the CRC awareness mean score**

209 Table 4 describes the relationship between the participants' background characteristics and their  
 210 CRC awareness mean score. Upon bivariate analyses, the respondents' gender, nationality, and  
 211 educational level were significantly associated with the awareness regarding CRC symptoms and  
 212 risk factors.

213

214 **Table 4:** The association between participants' background characteristics and their awareness  
 215 regarding CRC symptoms and risk factors. (N=448)

| Variable                  | Awareness              |                 |                        |                 |
|---------------------------|------------------------|-----------------|------------------------|-----------------|
|                           | Symptoms               |                 | Risk factors           |                 |
|                           | Mean score<br>(95% CI) | <i>p</i> -value | Mean score<br>(95% CI) | <i>p</i> -value |
| <b>Age</b>                |                        | 0.201           |                        | 0.082           |
| 50-59                     | 3.77 (3.42, 4.12)      |                 | 5.67 (5.26, 6.08)      |                 |
| 60 or more                | 3.43 (3.05, 3.82)      |                 | 5.12 (4.65, 5.59)      |                 |
| <b>Gender</b>             |                        | 0.146           |                        | 0.003*          |
| Male                      | 3.41 (3.01, 3.80)      |                 | 4.92 (4.44, 5.40)      |                 |
| Female                    | 3.79 (3.45, 4.13)      |                 | 5.85 (5.46, 6.24)      |                 |
| <b>Nationality</b>        |                        | <0.001*         |                        | <0.001*         |
| Qatari                    | 2.71 (2.25, 3.18)      |                 | 4.63 (4.03, 5.23)      |                 |
| Non-Qatari Arab           | 4.20 (3.85, 4.54)      |                 | 5.81 (5.42, 6.21)      |                 |
| Non-Arab                  | 3.30 (2.71, 3.89)      |                 | 5.42 (4.67, 6.16)      |                 |
| <b>Marital status</b>     |                        | 0.846           |                        | 0.668           |
| Married                   | 3.63 (3.35, 3.92)      |                 | 5.46 (5.12, 5.80)      |                 |
| Unmarried                 | 3.56 (2.90, 4.22)      |                 | 5.26 (4.54, 5.98)      |                 |
| <b>Level of education</b> |                        | <0.001*         |                        | 0.003*          |
| No formal education       | 2.00 (1.45, 2.55)      |                 | 4.07 (3.22, 4.92)      |                 |
| Primary                   | 3.55 (2.95, 4.15)      |                 | 5.72 (5.12, 6.32)      |                 |
| Secondary                 | 3.61 (3.10, 4.13)      |                 | 5.80 (5.15, 6.45)      |                 |
| Tertiary                  | 4.26 (3.86, 4.65)      |                 | 5.58 (5.10, 6.06)      |                 |
| <b>Employment</b>         |                        | 0.319           |                        | 0.04*           |
| Employed                  | 3.49 (3.08, 3.90)      |                 | 5.09 (4.61, 5.58)      |                 |
| Unemployed                | 3.75 (3.43, 4.08)      |                 | 5.74 (5.35, 6.13)      |                 |

216 \* Statistically significant.

### 218 Predictors of colorectal cancer awareness

219 The univariate analysis showed that gender, nationality, and level of education were associated  
 220 with the overall awareness of CRC among our study participants (Table 5).

221 The fully adjusted regression model (Table 5) showed that female participants possessed higher  
 222 overall awareness of CRC by a score of 2.52 (95% CI: 1.15 – 3.88) compared to males.  
 223 Furthermore, non-Qatari Arabs and non-Arabs were significantly more likely to be aware of CRC  
 224 compared to Qataris by a score of 2.91 (95% CI: 1.64 – 4.18) and 1.76 (95% CI: 0.28 – 3.24)  
 225 respectively. Moreover, participants with primary, secondary and tertiary education were

226 significantly more likely to have a high awareness of CRC compared to participants without formal  
 227 education by a score of 3.53 (95% CI: 1.85 – 5.23), 2.97 (95% CI: 1.29 – 4.66), and 4.10 (95% CI:  
 228 2.55 – 5.66) respectively. On the other hand, age, marital status and employment did not show  
 229 significant difference of the overall score in the regression model.

230 **Table 5:** The predictors of overall awareness of colorectal cancer among the study participants  
 231 (linear regression) (N=448)

| Variable                  | Univariate linear analysis |                                        |                 | Multiple linear regression           |                 |
|---------------------------|----------------------------|----------------------------------------|-----------------|--------------------------------------|-----------------|
|                           | Mean (SD)                  | Unadjusted difference in mean (95% CI) | <i>p</i> -value | Adjusted difference in mean (95% CI) | <i>p</i> -value |
| <b>Age</b>                |                            |                                        |                 |                                      |                 |
| 50-59                     | 9.44 (5.50)                | Reference                              |                 | Reference                            |                 |
| 60 or more                | 8.50 (5.54)                | -0.94 (-1.97 - 0.09)                   | 0.07            | 0.33 (-0.74 – 1.41)                  | 0.53            |
| <b>Gender</b>             |                            |                                        |                 |                                      |                 |
| Male                      | 8.31 (5.80)                | Reference                              |                 | Reference                            |                 |
| Female                    | 9.62 (5.19)                | 1.31 (0.30 - 2.33)                     | 0.01*           | 2.52 (1.15 – 3.88)                   | 0.001*          |
| <b>Nationality</b>        |                            |                                        |                 |                                      |                 |
| Qatari                    | 7.30 (5.05)                | Reference                              |                 | Reference                            |                 |
| Non-Qatari Arab           | 9.99 (5.12)                | 2.68 (1.44 - 3.92)                     | <0.001*         | 2.91 (1.64 – 4.18)                   | <0.001*         |
| Non-Arab                  | 8.72 (6.40)                | 1.41 (-0.43 – 2.87)                    | 0.05*           | 1.76 (0.28 – 3.24)                   | 0.02*           |
| <b>Marital status</b>     |                            |                                        |                 |                                      |                 |
| Married                   | 9.08 (5.63)                | Reference                              |                 | Reference                            |                 |
| Unmarried                 | 8.73 (4.84)                | 0.35 (-1.17 – 1.87)                    | 0.61            | -0.62 (-2.13 – 0.88)                 | 0.41            |
| <b>Level of education</b> |                            |                                        |                 |                                      |                 |
| No formal education       | 6.01 (5.34)                | Reference                              |                 | Reference                            |                 |
| Primary                   | 9.27 (4.80)                | 3.25 (1.62 – 4.88)                     | <0.001*         | 3.53 (1.85 – 5.23)                   | <0.001*         |
| Secondary                 | 9.42 (5.21)                | 3.40 (1.77 – 5.02)                     | <0.001*         | 2.97 (1.29 – 4.66)                   | <0.001*         |
| Tertiary                  | 9.81 (5.74)                | 3.79 (2.27 – 5.30)                     | <0.001*         | 4.10 (2.55 – 5.66)                   | <0.001*         |
| <b>Employment</b>         |                            |                                        |                 |                                      |                 |
| Employed                  | 8.56 (5.89)                | Reference                              |                 | Reference                            |                 |
| Unemployed                | 9.47 (5.17)                | -0.91 (-1.93 – 0.11)                   | 0.08            | 0.79 (-0.62 – 2.20)                  | 0.27            |

232 Dependent variable: Overall awareness mean score. Enter multiple linear regression applied. Model assumption is  
 233 fulfilled. No interactions and no multi-collinearity were detected. R<sup>2</sup>= 14.0%. \* Statistically significant.

234

235

## 236 DISCUSSION

237 The current study aimed to assess the awareness of CRC symptoms and risk factors among adults  
 238 aged 50 to 74 years in Qatar. The mean awareness score of CRC symptoms among study

239 participants was 3.63 /9 (SD  $\pm$ 2.7), while that of risk factors was 5.43/11 (SD  $\pm$ 3.3). Thus, the  
240 overall mean awareness score was 9.03/20 (SD  $\pm$ 5.5).

241 This is in line with earlier studies in the region. A study in Bahrain among the general population  
242 revealed low awareness about the symptoms and risk factors of CRC. It was found that the score  
243 of overall CRC knowledge was 56 % and that of symptoms and risk factors was 59 % and 53 %  
244 respectively.<sup>15</sup> Also, a recent national study in Saudi Arabia examined the awareness of 5720  
245 participants on CRC-related symptoms and risk factors. As a result, the mean score of the  
246 respondents' awareness was low at 11.05/23.<sup>16</sup>

247 In comparison to our study, a population survey in the United Kingdom using the bowel/colorectal  
248 CAM instrument showed higher awareness regarding CRC symptoms and risk factors.  
249 Specifically, the most recognised symptom and risk factor in the British study were “blood in  
250 stools” (88.6%) and “close relative with bowel cancer” (65%). However, our study identified  
251 “lump in abdomen” (56.5%) and “daily eating of processed meat” (71%) to be the most recognised  
252 symptom and risk factor. The least recognised symptom in the UK study was “bowel does not  
253 empty” (47%). On the other hand, “pain in back passage” (22.5%) was the least recognised  
254 symptom in our study. “Diabetes” was the least recognised risk factor in both studies and was  
255 recalled by only a quarter of the participants.<sup>14</sup> The level of education among our study population  
256 (43.6% had tertiary education) was higher than that of the UK study (25.6%). However, this  
257 observation did not reflect on the level of CRC awareness. Subsequently, the level of education  
258 may not be associated with the level of health literacy. The observed difference in the awareness  
259 might be explained by the relatively recent introduction of the national bowel cancer screening  
260 program and awareness campaigns in Qatar. The program is a population-based initiative that aims  
261 at promoting education, awareness, and early detection of bowel cancer among those at risk (aged

1  
2  
3 262 50-74 years).<sup>17</sup> It is in line with the Public Health Strategy 2017-2022 which focuses on preventive  
4  
5 263 and community-based care.<sup>18</sup>  
6

7  
8 264 Another survey in Malaysia, using the bowel/colorectal CAM tool, revealed lower CRC awareness  
9  
10 265 in comparison to our findings. In the Malaysian study, the mean awareness scores for CRC  
11  
12 266 symptoms and risk factors was 2.89 (SD 2.96) and 3.49 (SD 3.17).<sup>19</sup> This could be explained by  
13  
14 267 the difference in the study settings and the characteristics of the participants. In our study, almost  
15  
16 268 half (43.6%) of the participants reported having a tertiary level of education. On the other hand,  
17  
18 269 the Malaysian survey was conducted in a rural area where only a minority of participants (6.6%)  
19  
20 270 had attained a tertiary level of education.  
21  
22

23  
24 271 The present study identified the female gender and formal education as significant predictors of  
25  
26 272 higher CRC awareness. Such results are in line with findings of a regional study conducted in the  
27  
28 273 United Arab Emirates.<sup>20</sup> Another survey of more than 10,000 participants in Hong Kong revealed  
29  
30 274 that male gender was associated with low CRC awareness.<sup>21</sup> On the other hand, a study in Saudi  
31  
32 275 Arabia and a community-based survey in Jordan reported no significant association between  
33  
34 276 gender and knowledge of CRC.<sup>(16, 22)</sup>  
35  
36  
37  
38

39 277 The current study has strengths and limitations. First, the study was the first of its kind to evaluate  
40  
41 278 CRC awareness and its predictors among the at-risk population in Qatar. The study achieved a  
42  
43 279 high response rate (87%) and the sample included a variety of nationalities that represents the  
44  
45 280 diversity of the community in Qatar. In addition, the use of a validated questionnaire through face-  
46  
47 281 to-face interviews by trained data collectors strengthened the validity of the study results.  
48  
49 282 However, the research has some limitations. First, we did not use the unprompted (open-ended)  
50  
51 283 items of the CAM questionnaire to satisfy the study's objectives and due to time constraint.  
52  
53  
54  
55  
56  
57  
58  
59  
60

284 Secondly, we did not assess the participants' family history for CRC. Lastly, the non-probability  
285 sampling method utilized in the study may affect the generalizability of the results.

## 286 **CONCLUSION**

287 In general, the awareness of CRC symptoms and risk factors was low among the at-risk (50-74  
288 years old) population in Qatar. Specifically, the regression analysis showed males, Qataris, and  
289 those with no formal education had low awareness of CRC symptoms and risk factors. This  
290 underlines the importance of tailoring future educational campaigns that are relevant, specific  
291 (with focus on the male gender and those with low education) and are based on local evidence and  
292 effective engagement of the target population.

## 293 **Acknowledgements**

294 We would like to acknowledge Dr. Eman Radwan for her effort in reviewing the manuscript.

## 295 **Competing Interests**

296 The authors declare no conflict of interest.

## 297 **Funding**

298 This study was funded by the Research Department of the Primary Health Care Corporation under  
299 protocol ID (PHCC/RC/18/05/001).

## 300 **Ethics**

301 This study was approved by the Institutional Review Board of the Primary Health Care  
302 Corporation under protocol ID (PHCC/RC/18/05/001).

## 303 **Contributors**

304 AA conceived and designed the study. AA, MC, MB, MO and OA contributed to the recruitment  
305 of the participants and to the acquisition of the data. AA analysed the data. NS and NA contributed

1  
2  
3 306 to the design of the work and interpretation of the findings. AA and MC evaluated the results and  
4  
5 307 wrote the manuscript. All authors revised and approved the final manuscript.  
6  
7

## 8 308 **Data availability**

9  
10 309 Data are available upon reasonable request.  
11  
12

## 13 310 **References**

- 14  
15 311 **1.** World Health Organization. Cancer [Internet]. 2018 [cited 24 November 2018]. Available  
16 312 from: <http://www.who.int/news-room/fact-sheets/detail/cancer>.  
17  
18 313 **2.** Center MM, Jemal A, Smith RA, et al. Worldwide variations in colorectal cancer. *CA Cancer J*  
19 314 *Clin.* 2009 Nov-Dec;59(6):366–78.  
20  
21 315 **3.** Edwards BK, Ward E, Kohler BA, Ehemann C, Zauber AG, Anderson RN, et al. Annual report  
22 316 to the nation on the status of cancer, 1975-2006, featuring colorectal cancer trends and impact of  
23 317 interventions (risk factors, screening, and treatment) to reduce future rates. *Cancer.* 2010 Feb 1;  
24 318 116(3):544–73.  
25  
26 319 **4.** World Cancer Research Fund/American Institute for Cancer Research. Diet, Nutrition,  
27 320 Physical Activity and Cancer: A Global Perspective. Continuous Update Project Expert Report  
28 321 2018. Washington DC: AICR; 2018.  
29  
30 322 **5.** Marley A, Nan H. Epidemiology of colorectal cancer. *Int J Mol Epidemiol Genet.* 2016 Sep  
31 323 30;7(3):105–114.  
32  
33 324 **6.** World Cancer Research Fund (WCRF)/American Institute for Cancer Research, “Cancer  
34 325 preventability estimates for body fatness,” WCRF International, 2013, Available from:  
35 326 <http://www.wcrf-uk.org/uk/preventing-cancer/cancer-preventability-statistics/bowel-cancer>.  
36  
37 327 **7.** Tseng TS, Holt CL, Shipp M, et al. Predictors of colorectal cancer knowledge and screening  
38 328 among church-attending African Americans and Whites in the Deep South. *J Community Health.*  
39 329 2009 Apr;34(2):90–7  
40  
41 330 **8.** Post DM, Katz ML, Tatum C, Dickinson SL, Lemeshow S, Paskett ED. Determinants of  
42 331 colorectal cancer screening in primary care. *J Cancer Educ.* 2008;23(4):241–47.  
43  
44 332 **9.** Power E, Van Jaarsveld CH, McCaffery K, Miles A, Atkin W, Wardle J. Understanding  
45 333 intentions and action in colorectal cancer screening. *Ann Behav Med.* 2008 Jun;35(3):285–294.  
46  
47 334 **10.** Anderson A, Caswell S, Macleod M, Craigie A, Stead M, Steele R et al. Awareness of  
48 335 Lifestyle and Colorectal Cancer Risk: Findings from the BeWEL Study. *BioMed Res Int.* 2015  
49 336 Oct; 2015:1-5.  
50  
51  
52  
53  
54  
55  
56  
57  
58  
59  
60

- 1  
2  
3 337 **11.** Qatar Population and Expat Nationalities [Internet]. Onlineqatar.com. 2019 [cited 23  
4 338 February 2020]. Available from: [https://www.onlineqatar.com/visiting/tourist-information/qatar-](https://www.onlineqatar.com/visiting/tourist-information/qatar-population-and-expat-nationalities)  
5 339 [population-and-expat-nationalities](https://www.onlineqatar.com/visiting/tourist-information/qatar-population-and-expat-nationalities)  
6  
7 340 **12.** Qatar National Cancer Registry, Annual report 2015 [Internet]. Doha: Ministry of Public  
8 341 Health; 2017 [cited 14 February 2020]. Available from:  
9 342 [https://www.moph.gov.qa/Admin/Lists/PublicationsAttachments/Attachments/53/QNCR-2015-](https://www.moph.gov.qa/Admin/Lists/PublicationsAttachments/Attachments/53/QNCR-2015-English.pdf)  
10 343 [English.pdf](https://www.moph.gov.qa/Admin/Lists/PublicationsAttachments/Attachments/53/QNCR-2015-English.pdf)  
11  
12  
13 344 **13.** The Cancer Awareness Measures (CAM) [Internet]. Cancer Research UK. [cited 14 February  
14 345 2020]. Available from: [https://www.cancerresearchuk.org/health-professional/awareness-and-](https://www.cancerresearchuk.org/health-professional/awareness-and-prevention/the-cancer-awareness-measures-cam#CAM_Use0)  
15 346 [prevention/the-cancer-awareness-measures-cam#CAM\\_Use0](https://www.cancerresearchuk.org/health-professional/awareness-and-prevention/the-cancer-awareness-measures-cam#CAM_Use0)  
16  
17 347 **14.** Power E, Simon A, Juszczyk D, Hiom S, Wardle J. Assessing awareness of colorectal cancer  
18 348 symptoms: Measure development and results from a population survey in the UK. *BMC Cancer*.  
19 349 2011 Aug 23;11(366):1-10.  
20  
21  
22 350 **15.** Nasaif H, Al Qallaf S. Knowledge of Colorectal Cancer Symptoms and Risk Factors in the  
23 351 Kingdom of Bahrain: A Cross- Sectional Study. *Asian Pac J Cancer Prev*. 2018 Aug  
24 352 24;19(8):2299-2304.  
25  
26  
27 353 **16.** Almadi M, Alghamdi F. The gap between knowledge and undergoing colorectal cancer  
28 354 screening using the Health Belief Model: A national survey. *Saudi J Gastroenterol*. 2019 Jan-  
29 355 Feb;25(1):27-39.  
30  
31  
32 356 **17.** Ministry of Public Health. Achieving Excellence in Cancer Care: A Vision for 2022. The  
33 357 National Cancer Framework 2017-2022. Doha: Ministry of Public Health; 2017.  
34  
35 358 **18.** Ministry of Public Health. National Health Strategy 2012-2017 | Ministry of Public Health  
36 359 [Internet]. Moph.gov.qa. [cited 20 December 2018]. Available from:  
37 360 <https://www.moph.gov.qa/health-strategies-n-frameworks/national-health-strategy-2012-2017>  
38  
39  
40 361 **19.** Su T, Goh J, Tan J, Muhaimah A, Pigeneswaren Y, Khairun N et al. Level of colorectal  
41 362 cancer awareness: a cross sectional exploratory study among multi-ethnic rural population in  
42 363 Malaysia. *BMC Cancer*. 2013 Aug 7;13(376):1-8.  
43  
44 364 **20.** Al-Sharbatti S, Muttappallymyalil J, Sreedharan J, Almosawy Y. Predictors of Colorectal  
45 365 Cancer Knowledge among Adults in the United Arab Emirates. *Asian Pac J Cancer Prev*.  
46 366 2017;18(9):2355–2359.  
47  
48  
49 367 **21.** Wong M, Hirai H, Luk A, Lam T, Ching J, Griffiths S et al. The Knowledge of Colorectal  
50 368 Cancer Symptoms and Risk Factors among 10,078 Screening Participants: Are High Risk  
51 369 Individuals More Knowledgeable? *PLoS ONE*. 2013 April 3;8(4):e60366.  
52  
53  
54 370 **22.** Taha H, Jaghbeer M, Shteivi M, AlKhalidi S, Berggren V. Knowledge and Perceptions about  
55 371 Colorectal Cancer in Jordan. *Asian Pac J Cancer Prev*. 2016;16(18):8479-8486.  
56  
57  
58  
59  
60



**STROBE 2007 (v4) Statement—Checklist of items that should be included in reports of *cross-sectional studies***

| Section/Topic                | Item # | Recommendation                                                                                                                                                                       | Reported on page # |
|------------------------------|--------|--------------------------------------------------------------------------------------------------------------------------------------------------------------------------------------|--------------------|
| <b>Title and abstract</b>    | 1      | (a) Indicate the study's design with a commonly used term in the title or the abstract                                                                                               | 1-2                |
|                              |        | (b) Provide in the abstract an informative and balanced summary of what was done and what was found                                                                                  | 2                  |
| <b>Introduction</b>          |        |                                                                                                                                                                                      |                    |
| Background/rationale         | 2      | Explain the scientific background and rationale for the investigation being reported                                                                                                 | 4-5                |
| Objectives                   | 3      | State specific objectives, including any prespecified hypotheses                                                                                                                     | 5                  |
| <b>Methods</b>               |        |                                                                                                                                                                                      |                    |
| Study design                 | 4      | Present key elements of study design early in the paper                                                                                                                              | 5-6                |
| Setting                      | 5      | Describe the setting, locations, and relevant dates, including periods of recruitment, exposure, follow-up, and data collection                                                      | 5-6                |
| Participants                 | 6      | (a) Give the eligibility criteria, and the sources and methods of selection of participants                                                                                          | 6                  |
| Variables                    | 7      | Clearly define all outcomes, exposures, predictors, potential confounders, and effect modifiers. Give diagnostic criteria, if applicable                                             | 7-8                |
| Data sources/<br>measurement | 8*     | For each variable of interest, give sources of data and details of methods of assessment (measurement). Describe comparability of assessment methods if there is more than one group | 7-8                |
| Bias                         | 9      | Describe any efforts to address potential sources of bias                                                                                                                            | 7                  |
| Study size                   | 10     | Explain how the study size was arrived at                                                                                                                                            | 6                  |
| Quantitative variables       | 11     | Explain how quantitative variables were handled in the analyses. If applicable, describe which groupings were chosen and why                                                         | 8                  |
| Statistical methods          | 12     | (a) Describe all statistical methods, including those used to control for confounding                                                                                                | 8                  |
|                              |        | (b) Describe any methods used to examine subgroups and interactions                                                                                                                  | 8                  |
|                              |        | (c) Explain how missing data were addressed                                                                                                                                          | N/A                |
|                              |        | (d) If applicable, describe analytical methods taking account of sampling strategy                                                                                                   | N/A                |
|                              |        | (e) Describe any sensitivity analyses                                                                                                                                                | N/A                |
| <b>Results</b>               |        |                                                                                                                                                                                      |                    |

|                          |     |                                                                                                                                                                                                              |       |
|--------------------------|-----|--------------------------------------------------------------------------------------------------------------------------------------------------------------------------------------------------------------|-------|
| Participants             | 13* | (a) Report numbers of individuals at each stage of study—eg numbers potentially eligible, examined for eligibility, confirmed eligible, included in the study, completing follow-up, and analysed            | 8     |
|                          |     | (b) Give reasons for non-participation at each stage                                                                                                                                                         | 8     |
|                          |     | (c) Consider use of a flow diagram                                                                                                                                                                           | N/A   |
| Descriptive data         | 14* | (a) Give characteristics of study participants (eg demographic, clinical, social) and information on exposures and potential confounders                                                                     | 9     |
|                          |     | (b) Indicate number of participants with missing data for each variable of interest                                                                                                                          | N/A   |
| Outcome data             | 15* | Report numbers of outcome events or summary measures                                                                                                                                                         | 9-10  |
| Main results             | 16  | (a) Give unadjusted estimates and, if applicable, confounder-adjusted estimates and their precision (eg, 95% confidence interval). Make clear which confounders were adjusted for and why they were included | 12-13 |
|                          |     | (b) Report category boundaries when continuous variables were categorized                                                                                                                                    | 11-13 |
|                          |     | (c) If relevant, consider translating estimates of relative risk into absolute risk for a meaningful time period                                                                                             | N/A   |
| Other analyses           | 17  | Report other analyses done—eg analyses of subgroups and interactions, and sensitivity analyses                                                                                                               | 11-12 |
| <b>Discussion</b>        |     |                                                                                                                                                                                                              |       |
| Key results              | 18  | Summarise key results with reference to study objectives                                                                                                                                                     | 13-14 |
| Limitations              | 19  | Discuss limitations of the study, taking into account sources of potential bias or imprecision. Discuss both direction and magnitude of any potential bias                                                   | 15-16 |
| Interpretation           | 20  | Give a cautious overall interpretation of results considering objectives, limitations, multiplicity of analyses, results from similar studies, and other relevant evidence                                   | 14-15 |
| Generalisability         | 21  | Discuss the generalisability (external validity) of the study results                                                                                                                                        | 16    |
| <b>Other information</b> |     |                                                                                                                                                                                                              |       |
| Funding                  | 22  | Give the source of funding and the role of the funders for the present study and, if applicable, for the original study on which the present article is based                                                | 16    |

\*Give information separately for cases and controls in case-control studies and, if applicable, for exposed and unexposed groups in cohort and cross-sectional studies.

**Note:** An Explanation and Elaboration article discusses each checklist item and gives methodological background and published examples of transparent reporting. The STROBE checklist is best used in conjunction with this article (freely available on the Web sites of PLoS Medicine at <http://www.plosmedicine.org/>, Annals of Internal Medicine at <http://www.annals.org/>, and Epidemiology at <http://www.epidem.com/>). Information on the STROBE Initiative is available at [www.strobe-statement.org](http://www.strobe-statement.org).
